1           **Active transcription regulates ORC/MCM distribution whereas replication**  
2                           **timing correlates with ORC density in human cells**

3

4 Short title: Genome-wide human ORC/ MCM distribution

5

6 Authors: Nina Kirstein<sup>1</sup>, Alexander Buschle<sup>1,2</sup>, Xia Wu<sup>3</sup>, Stefan Krebs<sup>4</sup>, Helmut  
7 Blum<sup>4</sup>, Wolfgang Hammerschmidt<sup>1,2</sup>, Olivier Hyrien<sup>3</sup>, Benjamin Audit<sup>5\*</sup>, Aloys  
8 Schepers<sup>1,6\*</sup>

9

10 Authors affiliations:

11 <sup>1</sup> Research Unit Gene Vectors, Helmholtz Zentrum München (GmbH), German  
12 Research Center for Environmental Health Marchioninistraße 25, 81377 Munich,  
13 Germany; N.K.: current address: University of Miami, Miller School of Medicine,  
14 Sylvester Comprehensive Cancer Center, Department of Human Genetics,  
15 Biomedical Research Building, 1501 NW 10<sup>th</sup> Avenue, Miami, FL 33136, USA  
16 <sup>2</sup>German Center for Infection Research (DZIF), Partner site Munich, Germany,  
17 <sup>3</sup> Institut de Biologie de l'ENS (IBENS), Département de Biologie, Ecole Normale  
18 Supérieure, CNRS, Inserm, PSL Research University, F-75005 Paris, France; current  
19 address: Group of Replication program and genome instability, UMR3244 –  
20 Dynamics of Genetic Information, Institut Curie, Centre de recherche, 26 rue d'Ulm,  
21 F-75005 Paris, France; X.W. current address: Zhongshan School of Medicine, Sun  
22 Yat-sen University, 74 Zhongshan Er Road, Guangzhou, Guangdong Province,  
23 China, 510080.

24 <sup>4</sup> Laboratory for Functional Genome Analysis (LAFUGA), Gene Center of the  
25 Ludwig-Maximilians-Universität (LMU) München, Feodor-Lynen-Str. 25, D-81377  
26 Munich, Germany

27 <sup>5</sup> Université Lyon, ENS de Lyon, Univ Claude Bernard Lyon 1, CNRS, Laboratoire  
28 de Physique, 46 allée d'Italie, F-69342, Lyon, France

29 <sup>6</sup> Monoclonal Antibody Core Facility, Helmholtz Zentrum München, German  
30 Research Center for Environmental Health, Ingolstädter Landstraße 1, D-85764  
31 Neuherberg, Germany

32

33 Corresponding authors: Aloys Schepers, Helmholtz Zentrum München, German  
34 Research Center for Environmental Health (GmbH), Monoclonal Antibody Core  
35 Facility, Ingolstädter Landstraße 1, D-85764 Neuherberg, Germany, +49 89 3187  
36 1509, [schepers@helmholtz-muenchen.de](mailto:schepers@helmholtz-muenchen.de);

37 Benjamin Audit, Université Lyon, ENS de Lyon, Univ Claude Bernard Lyon 1,  
38 CNRS, Laboratoire de Physique, 46 allée d'Italie, F-69342, Lyon, France

39

40 Keywords: ORC, MCM complex, CHIP-seq, DNA replication, OK-seq, replication  
41 initiation, replication timing, transcription

42 **Abstract**

43 Eukaryotic replication initiates during S phase from origins that have been licensed in  
44 the preceding G1 phase. Here, we compare ChIP-seq profiles of the licensing factors  
45 Orc2, Orc3, Mcm3, and Mcm7 with replication initiation events obtained by Okazaki  
46 fragment sequencing. We demonstrate that MCM is displaced from early replicating,  
47 actively transcribed gene bodies, while ORC is mainly enriched at active TSS. Late  
48 replicating, H4K20me3 containing initiation zones display enhanced ORC and MCM  
49 levels. Furthermore, we find early RTDs being primarily enriched in ORC, compared  
50 to MCM, indicating that ORC levels are involved in organizing the temporal order of  
51 DNA replication. The organizational connection between active transcription and  
52 replication competence directly links changes in the transcriptional program to  
53 flexible replication patterns, which ensures the cell's flexibility to respond to  
54 environmental cues.

55 Mammalian DNA replication is a highly orchestrated process ensuring the  
56 exact inheritance of genomes of tens to thousands of million base pairs in size. In  
57 human cells, replication initiates from 30,000 – 50,000 replication origins per cell<sup>1,2</sup>.  
58 Origins are not activated synchronously but are organized into individual replication  
59 timing domains (RTDs), which replicate in a timely coordinated and reproducible  
60 order from early to late in S phase<sup>3,4</sup>. The replication cascade or domino model  
61 proposes that within one RTD, replication first initiates at the most efficient origins  
62 and then spreads to less efficient origins. RTDs are separated by timing transition  
63 regions and it is debated whether replication spreading is blocked at these regions<sup>5,6</sup>.

64 The establishment of replication competence occurs in late mitosis and during  
65 the G1 phase of the cell cycle<sup>7</sup>. The first step is the cell-cycle dependent assembly of  
66 the evolutionary conserved origin recognition complex (ORC) to origins<sup>8,9</sup>. ORC and  
67 two chaperones, Cdt1 and Cdc6, cooperatively load minichromosome maintenance  
68 (MCM) complexes as double hexamers<sup>10-12</sup>. The MCM complex is the central unit of  
69 the replicative helicase. The resulting multi-subunit complex is termed pre-replicative  
70 complex (pre-RC). A single ORC loads multiple MCM helicases, which are  
71 translocated from their original loading site, but no ORC, neither Cdc6, nor Cdt1 are  
72 required for origin activation<sup>13,14</sup>.

73 Replication origins are defined functionally. In the unicellular *S. cerevisiae*,  
74 replication origins are genetically characterized by the ARS consensus sequence<sup>15</sup>. In  
75 multicellular organisms, replication initiates from flexible locations and no common  
76 consensus element for origin selection and activation has yet been identified. It is  
77 generally believed that chromatin features including histone modifications,  
78 nucleosome dynamics and DNA modifications contribute to origin specification<sup>1,16,17</sup>,  
79 including H4K20me3 that supports the licensing of a subset of late replicating origins



80 in heterochromatin<sup>18</sup>. Thus, changing environmental conditions, DNA damage and the  
81 development status of each cell are integrated into highly dynamic local chromatin  
82 profiles, which influence the plasticity of origin selection<sup>1</sup>.

83 Different approaches have been developed to characterize mammalian  
84 replication initiation by single-molecule visualization (DNA combing) or sequencing  
85 of purified initiation products (short nascent strands (SNS-seq), initiation site  
86 sequencing (INI-seq) replication-bubbles containing restriction fragments (bubble-  
87 seq) or elongation intermediates (Okazaki fragments). In various human cell lines,  
88 SNS-seq and INI-seq have identified specific replication initiation sites, which mainly  
89 correlate with transcriptional start sites (TSS) and locate close to CG-rich regions that  
90 are enriched with G-quadruplex motifs (G4) and CpG-islands<sup>1,16,19,20</sup>. Interestingly,  
91 origins identified by bubble-seq correlate with DNase hypersensitive regions and the  
92 5' end but not the body of active transcription units<sup>21</sup>. Both SNS- and bubble-seq  
93 detect a higher origin density in early RTDs than in mid-to-late RTDs<sup>19,21</sup>. Strand-  
94 oriented sequencing of Okazaki fragments (OK-seq) reveals the direction of  
95 replication forks allowing the mapping of initiation and termination events<sup>22-24</sup>.  
96 Bubble-seq<sup>21</sup> and OK-seq<sup>25</sup> and DNA combing<sup>26</sup> studies of mammalian cells  
97 demonstrated that replication initiates in broad initiation zones, characterized by  
98 flexible initiation from random sites. OK-seq studies identified early initiation zones  
99 that are often flanked by actively transcribed genes and are especially enriched in  
100 open chromatin, while flanking transcribed gene bodies are enriched in replication  
101 termination events<sup>24,25</sup>. In contrast, in late RTDs, initiation zones are distantly located  
102 from active genes and termination occurs over very broad, gene-poor segments.  
103 Comparing replication activation events resulting from SNS-seq, bubble-seq, and OK-

104 seq, the highest concordance was observed between initiation zones detected by OK-  
105 seq and bubble-seq<sup>25</sup>.

106 Chromatin immunoprecipitation followed by next-generation sequencing  
107 (ChIP-seq) is a complementary method to map binding sites of origin licensing  
108 proteins. ORC and MCM chromatin binding and their relationships with nuclear  
109 organization and chromatin features are essential to understand the emergence of  
110 replication patterns and replication timing. *Drosophila* ORC ChIP-seq suggests a  
111 stochastic binding pattern often colocalizing at open chromatin marks found at TSS<sup>27</sup>.  
112 Genome-wide MCM mapping experiments revealed that this complex is initially  
113 loaded at ORC binding sites in absence of Cyclin E/CDK2 activity. With the rise in  
114 Cyclin E/CDK2 activity in late G1, MCM is abundantly loaded and redistributed,  
115 resulting in a loss of spatial overlap with ORC<sup>13</sup>. In humans, ChIP-seq experiments  
116 with single ORC subunits led to the identification of 13,000 to 52,000 potential ORC  
117 binding sites<sup>28,29</sup>. In a previous study, we compared the number of licensed origins in  
118 the EBV genome with single replication initiation events and found an excess of 5-10  
119 licensing origins established per genome<sup>30</sup>. A recent genome-wide Mcm7 binding  
120 study in human HeLa cells proposed that MCM binds in excess regardless of the  
121 chromatin environment, but that origin activation preferentially occurs upstream of  
122 active TSSs<sup>31</sup>.

123 Here, we present the first comparative survey of four different pre-RC  
124 components and replication initiation events in the human genome by combining  
125 ChIP-seq and OK-seq analyses in the lymphoblastoid Raji cell line. We perform ORC  
126 and MCM ChIP in pre-replicative (G1) and post-replicative chromatin, to obtain a  
127 comprehensive picture of ORC/ MCM behavior before and after replication. We find  
128 ORC and MCM broadly distributed over the genome. In early replicating domains,

129 active transcription locally influences ORC and MCM positioning and consequently  
130 replication initiation profiles. In particular MCM are displaced from actively  
131 transcribed gene bodies in G1, while ORC is enriched at active TSS. MCM are  
132 present at TSS only in post-replicative chromatin. We show that H4K20me3 is  
133 present in a subset of non-genic late replicating initiation zones, which are enriched in  
134 ORC/ MCM binding. This confirms our previous finding that H4K20me3-mediated  
135 ORC-DNA binding enhances origin activity in certain environments<sup>18,32</sup>. Finally, we  
136 find that the global density of ORC highly correlates with replication timing, an effect  
137 observed less prominently for MCM. These results argue that ORC but not MCM  
138 may dictate replication timing.

139 **Results**

140 MODERATE AVERAGING IS THE BEST APPROACH FOR ORC AND MCM DISTRIBUTION  
141 ANALYSIS

142 To obtain a complete picture of ORC and MCM distributions prior to  
143 replication initiation, we cell-cycle fractionated human lymphoblastoid Raji cells by  
144 centrifugal elutriation into a pre-replicative G1 population (hereafter referred to as  
145 *pre*) - which is enriched for ORC/MCM bound chromatin<sup>30</sup> - and a post-replicative  
146 cell population (hereafter referred to as *post*), including S, G2 and mitotic cell  
147 populations. Propidium Iodide staining followed by FACS (Supplementary Figure 1a)  
148 and Western blot analyses of cyclins A, B, and H3S10 phosphorylation  
149 (Supplementary Figure 1b) confirmed the cell cycle stages. To ensure unbiased  
150 detection of ORC and MCM positions by ChIP-seq, we simultaneously targeted two  
151 members of each complex: Orc2, Orc3, Mcm3 and Mcm7, using validated ChIP-  
152 grade antibodies<sup>30,33,34</sup>. ChIP efficiency and quality were measured using the Epstein-  
153 Barr virus latent origin *oriP* as reference (Supplementary Figure 1c). In EBV, EBNA1  
154 recruits ORC to the *oriP* dyad symmetry element DS. Consequently, we detected  
155 ORC at DS in a cell-cycle independent manner, while the presence of MCM was cell-  
156 cycle dependent<sup>30,33</sup>, as expected.

157 ChIP-sequencing of two ORC (Orc2, Orc3) and of three MCM (Mcm3,  
158 Mcm7) replicates in both *pre*- and *post*-fractions resulted in reproducible, but  
159 dispersed ChIP-seq signal accumulations at the established replication origin  
160 Mcm4/PRKDC (Fig. 1a (*pre*), Supplementary Figure 2a (*post*)). We first employed  
161 the MACS2 peak-calling program<sup>35,36</sup>, but found that the obtained results were too  
162 dependent on the chosen settings and concluded that ORC/ MCM distribution was too

163 dispersed to be efficiently captured by peak calling (data not shown), requiring an  
164 alternative approach.

165         Consequently, we summed up the reads of the ChIP replicates and combined  
166 the number of ChIP-seq reads in 1 kb bins and normalized this signal against the  
167 mean read frequency of the entire ChIP sample, followed by input division. We chose  
168 1 kb bins as this window size averages out experimental variations due to the  
169 stochastic binding of ORC/ MCM. At the same time, this window is small enough to  
170 detect local changes in the binding patterns. As a proof for this assumption, ChIP  
171 enrichments at the Mcm4/PRKDC origin were detected after binning (Fig. 1b (*pre*),  
172 Supplementary Figure 2b (*post*)). The relative read frequencies of Orc2/Orc3 (Fig. 1c)  
173 and Mcm3/Mcm7 (Fig. 1d) showed high Pearson correlation coefficients of  $r = 0.866$   
174 and  $r = 0.879$ , respectively. The correlation between ORC and MCM was only  
175 slightly lower (Mcm3/Orc2/3:  $r = 0.775/0.757$ , Mcm7/Orc2/3:  $r = 0.821/0.800$ , Fig.  
176 1e). Hierarchical clustering based on Pearson correlation between ChIP profiles  
177 showed that ORC and MCM profiles clustered together, independently from the cell  
178 cycle stage. We conclude that this binning approach is valid for analyzing our ChIP-  
179 seq data.

180         Miotto et al. demonstrated that Orc2 positions highly depend on chromatin  
181 accessibility and colocalize with DNase hypersensitive (HS) sites present at active  
182 promoters or enhancers<sup>29</sup>. Furthermore, Sugimoto et al. observed that active origins,  
183 enriched with MCM7 correlate with open chromatin sites<sup>31</sup>. As a DNase HS profile of  
184 the Raji cell line does not exist, we compared the ENCODE dataset of DNase HS  
185 clusters from 125 cell lines with ORC and MCM read frequencies. We indeed found a  
186 significant enrichment of ORC and MCM at DNase HS regions larger than 1 kb,

187 compared to regions deprived of DNase HS sites (Supplementary Figure 3a (*pre*) and  
188 3b (*post*)), validated our data further.

189

190 ORC/MCM ARE ENRICHED IN ZONES OF REPLICATION INITIATION DEPENDENT ON  
191 TRANSCRIPTION

192 After confirming the validity of the ChIP experiments and establishing an  
193 analysis approach based on moderate averaging, we compared the relative read  
194 frequencies of each pre-RC component to active replication initiation units. Using  
195 OK-seq in Raji cells<sup>37</sup>, we calculated the replication fork directionality (RFD), and  
196 delineated zones of preferential replication initiation as ascending segments (AS) of  
197 the RFD profile. OK-seq does not detect single replication initiation events, but  
198 regions of preferential replication initiation (AS)<sup>22,24,25</sup>. To assess ChIP signals within  
199 AS, we only kept AS of sizes > 20 kb. Using the RFD shift across the AS ( $\Delta$ RFD) as  
200 a measure of replication initiation efficiency, we further required  $\Delta$ RFD > 0.5 to make  
201 sure AS corresponded with efficient initiation zones. In total, we selected 2,957 AS,  
202 with an average size of 52.3 kb, which covered 4.9% (155 Mb) of the genome (Fig.  
203 2a, green bars, Table 1). 2,451 (83%) of all AS located close to genic regions (AS  
204 extended by 20 kb on both sides overlapped with at least one annotated gene).  
205 Thereby, 673 AS (22.8% of all AS) were flanked by actively transcribed genes (TPM  
206 > 3) at both sides (type 1 AS) with less than 20 kb between AS borders and the closest  
207 transcribed gene. 1,026 AS (34.7%) had only one border associated to a transcribed  
208 gene (type 2 AS). 506 AS (17.1%) were devoid of proximal genes (non-genic AS),  
209 where 20 kb extended AS did not overlap with any annotated gene (Table 1).  
210 Although the slope did not change considerably in the different AS types, type 1 AS  
211 were on average the most efficient, while non-genic AS were slightly less efficient

212 (Supplementary Figure 4a). Furthermore, type 1 and type 2 AS located to early  
213 replication timing domains, while non-genic AS were predominantly late replicating  
214 (Supplementary Figure 4b), which is in agreement with AS previously described for  
215 GM06990 and HeLa<sup>25</sup>.

216 Replication can only be activated, when functional pre-RCs are established in  
217 the preceding G1 phase. We set our ORC/ MCM ChIP-seq signals in relation to RFD  
218 and computed the relative read frequencies of ORC/ MCM around all AS aggregate  
219 borders. In the *pre*-fraction, both ORC and MCM were enriched within AS compared  
220 to flanking regions (Fig. 2b).

221 To resolve the impact of transcriptional activity, we repeated this calculation  
222 and sorted for type 1 AS (Fig. 2c), type 2 AS (Fig. 2d), and non-genic AS (Fig. 2e).  
223 This analysis revealed that transcriptional activity in AS flanking regions did not only  
224 lead to increased ORC levels inside AS (comparing Fig. 2b and Fig. 2c), but also  
225 resulted in a prominent depletion of MCM from transcribed flanking regions (Figs. 2c  
226 and 2d). In contrast, in type 2 AS, ORC/ MCM levels remained elevated at AS  
227 borders without transcriptional activity (Fig. 2d, left border), and no evident ORC/  
228 MCM enrichments were detected within non-genic AS (Fig. 2e). *Post*-fraction  
229 profiles display the same tendencies, however to a lesser extent (Supplementary  
230 Figure 5a-d), implying a partial displacement of ORC/ MCM during S-phase. AS  
231 borders characterized by transcriptional activity were locally enriched by ORC and  
232 MCM. This is in line with previously detected Orc1 accumulation at AS borders<sup>25</sup> and  
233 indicates that the *post*-fraction contains an important portion of cells in late mitosis,  
234 when origin licensing is initiated.

235

236 ORC IS ENRICHED AT TSS OF ACTIVELY TRANSCRIBED GENES AND MCM DEPLETED  
237 FROM GENE BODIES

238         Replication initiation often correlates with active gene transcription<sup>16,19,38,39</sup>. A  
239 recent study using OK-seq even linked both replication initiation and termination to  
240 transcription<sup>24</sup>. Furthermore, ORC/MCM enrichment in type 1 and 2 AS compared to  
241 genic flanking regions (Fig. 2c and d) argue for a major contribution of active  
242 transcription to ORC/ MCM positioning. To study the association of ORC/ MCM  
243 localizations and transcriptional activity, we set our ChIP-seq data in relation with  
244 transcription profiles obtained from asynchronously cycling Raji cells. We analyzed  
245 ORC/ MCM relative read frequencies around active TSS and transcriptional  
246 termination sites (TTS) (Fig. 3). ORC relative read distribution of G1-phased cells  
247 (*pre*) was significantly enriched at active TSS as already demonstrated in  
248 *Drosophila*<sup>27</sup>, and human cells<sup>28,29</sup>. Relative read frequency levels of ORC were  
249 moderately but significantly higher upstream of TSS and downstream of TTS than  
250 within genes (Fig. 3a). Approximately 45% of actively transcribed gene bodies were  
251 significantly depleted from ORC in the *pre*-fraction (Supplementary Table 1).  
252 Compared to ORC, MCM enrichment at TSS was less prominent, however, depletion  
253 from gene bodies was more pronounced (Fig. 3a). 75% and 58% of investigated  
254 transcribed gene bodies were significantly depleted from Mcm3 and Mcm7,  
255 respectively (Supplementary Table 1). Interestingly, while ORC profiles did only  
256 slightly change from *pre*- to *post*-fractions (Fig. 3a vs. Fig. 3b), MCM profiles of the  
257 *post*-fraction rather resembled ORC profiles, with a significant peak at TSS and a less  
258 pronounced depletion from gene bodies (Fig. 3b). This observation is explained by a  
259 drastic reduction of the number of significant MCM depleted genes in the *post*-  
260 fraction (from 75.2% (Mcm3) and 58.3% (Mcm7) in *pre*-fractions to 28.5% and



261 16.7% in *post*-fractions). The number of ORC depleted genes only decreased from  
262 44% in *pre*- to 34-38% in *post*-fractions (Supplementary Table 1).

263 Chen *et al.* recently reported that transcriptional activity models the replication  
264 initiation profile<sup>24</sup>. We found that TSSs of inactive genes were hardly enriched for  
265 ORC/ MCM and that inactive gene bodies were not depleted from licensing  
266 components (Fig. 3c). Although active transcription is necessary for ORC enrichment  
267 at TSS, we also observed that increasing transcriptional activity did not have any  
268 major impact on ORC/ MCM enrichments at TSS (Fig. 3d, Supplementary Fig. 6a  
269 (*post*)). The same is true for ORC/ MCM depletion from gene bodies in *pre*- or *post*-  
270 fractions (Fig. 3e and Supplementary Fig. 6b).

271 The *pre*-fraction represents a cell cycle stage immediately prior to origin activation,  
272 with an excess of MCM loaded onto chromatin<sup>13,40</sup>. Here, we found MCM being  
273 actively displaced from gene bodies by the transcriptional machinery, as previously  
274 proposed in *Drosophila* by Powell *et al*<sup>13</sup>. In post-replicative chromatin, obtained  
275 from a cell population containing a prominent fraction of mitotic cells  
276 (Supplementary Figure 1b), we found that MCM co-localized with ORC at TSS,  
277 possibly reflecting early MCM loading. These findings suggest, that the co-  
278 directionality between DNA replication and transcription of active genes is achieved  
279 by enhancing pre-RC formation at TSS<sup>24</sup>. Inhibiting origin licensing within active  
280 genes contributes to genome stability by preventing intragenic replication initiation  
281 and thus colliding events that originate from head-on oriented DNA replication and  
282 transcription<sup>41</sup>.

283

284 LATE REPLICATING AS ARE CHARACTERIZED BY H4K20ME3

285           In the preceding sections, we showed that the enrichment of ORC and MCM  
286 at type 1 and type 2 AS depended on transcriptional activity. Non-genic AS were  
287 characterized by the absence of any transcriptional annotation. Interestingly, we did  
288 not detect a significant accumulation of ORC/ MCM at late replicating non-genic AS  
289 (Fig. 2e). Therefore, we asked for other characteristics determining their replication.  
290 We recently demonstrated that H4K20me3 supports the licensing of a subset of late  
291 replicating origins in heterochromatin<sup>18</sup> and hypothesized that H4K20me3 may also  
292 influence licensing of non-genic AS. We performed ChIP for H4K20me3 and its  
293 precursor H4K20me1 in three replicates in *pre*-fractions and validated its success by  
294 qPCR (Supplementary Figure 7 a (H4K20me3) and 7b (H4K20me1)). After  
295 sequencing, we performed MACS2 broad peak-detection and kept only peaks  
296 overlapping in all three samples (16852 peaks for H4K20me3 and 12264 peaks for  
297 H4K20me1, see also Supplementary Table 2 for further characterization). H4K20me3  
298 peak sizes ranged from 200 bp to 105 kb (200 bp to 183 kb for H4K20me1,  
299 Supplementary Table 2, Supplementary Figure 7c). When calculating ORC/ MCM  
300 coverage of the *pre*-fraction at H4K20me3/me1 peaks > 1 kb (12251/ 6277 peaks,  
301 respectively), we predominantly detected ORC and also some MCM enrichment at  
302 H4K20me3 sites (Fig. 4a, Supplementary Fig. 7d (*post*)). By contrast, H4K20me1  
303 peaks were not enriched in both ORC and MCM (Supplementary Figure 7e).

304           Consequently, we asked, if H4K20me3 was enriched in AS. When calculating  
305 H4K20me3 coverage at the different AS types, we specifically detected H4K20me3  
306 in non-genic AS, representing the first histone modification characterizing late  
307 replicating AS (Fig. 4b and c). Starting from 506 non-genic AS, we extracted a subset  
308 of 154 non-genic AS associated to H4K20me3 (where H4K20me3 relative read  
309 frequency was above the genome mean value by more than 1.5 standard deviation),

310 versus 242 non-genic AS with H4K20me3 levels lower than genome average. We  
311 found ORC and MCM present at the H4K20me3-associated subgroup compared to  
312 non-genic AS without H4K20me3 (Fig. 4d). These results indicate that  
313 transcriptionally independent non-genic AS are potentially characterized by specific  
314 histone modifications that lead to ORC/ MCM recruitment, albeit remaining  
315 undetectable when considering all non-genic AS.

316

#### 317 EARLY REPLICATION TIMING DOMAINS ARE ENRICHED FOR ORC

318       When assessing ORC/ MCM distributions at a local level, ORC/ MCM  
319 seemed to be nearly equally distributed throughout the entire genome with the  
320 exception of genic regions. Consequently, we asked whether ORC/ MCM  
321 distributions impact on the more global event of replication timing as has been  
322 observed in *S. cerevisiae* for MCM<sup>42</sup>. We extracted early and late RTDs from Raji  
323 cells using Early/Late Repli-seq data from Sima *et al.*<sup>43</sup>. Employing a threshold of  
324 early to late ratio  $> 1.6$  for early RTDs and  $< -2.0$  for late RTDs resulted in 302 early  
325 RTDs covering 642.8 Mb and 287 late RTDs covering 617.4 Mb of the genome.  
326 Working in 10 kb bins, we removed all bins containing annotated genes in a  $\pm 10$  kb  
327 window from the analysis, to obtain data independent from transcriptional activity.  
328 Calculating the mean ORC/ MCM relative read frequencies of the *pre*-fraction in  
329 early compared to late RTDs revealed ORC being 1.4-times enriched in early RTDs  
330 compared to late RTDs (Fig. 5a; Supplementary Table 3). By contrast, MCM were  
331 less enriched in early and less depleted from late RTDs (Fig. 5a; Supplementary Table  
332 3). In the *post*-fraction, ORC enrichment reduced to a ratio early/late of 1.2, while  
333 especially Mcm3 relative read frequencies were smaller in early RTDs than in late  
334 RTDs (Fig. 5b; Supplementary Table 3). We consequently conclude, that elevated

335 ORC levels are tightly associated with early replication timing throughout the cell  
336 cycle, while ORC levels decrease below average in late RTDs. MCM levels however,  
337 albeit showing the same tendencies, seem to be less assertive.

338 In summary, we demonstrate that ORC abundance correlates with early  
339 replication timing and propose a model in which ORC/ MCM positioning is strongly  
340 affected by transcriptional activity in early RTDs (Fig. 6a). However, the association  
341 of origin licensing and replication initiation in late RTDs with specific histone  
342 modifications, e.g. H4K20me3 (Fig. 6b), illustrates that ORC/ MCM alone are not  
343 sufficient to explain the observed replication initiation profiles. Missing factors likely  
344 remain to be described e.g. at the transcription free border of type 2 AS.

345

## 346 **Discussion**

347 The study presented here provides a novel comprehensive genome-wide  
348 analysis of multiple pre-RC proteins and replication initiation in human cells. We find  
349 that on the local level, ORC and MCM are enriched in zones of replication initiation,  
350 especially in early replicating domains. Active transcription highly influences the  
351 distribution of licensed origins: ORC accumulates at active TSS and especially MCM  
352 is depleted from actively transcribed gene bodies (Fig. 3). We demonstrate that late  
353 replicating non-genic AS associated with H4K20me3 are characterized by elevated  
354 ORC/ MCM levels. When looking at the global level of replication timing, we find  
355 that high ORC and , to a lesser extent MCM, correlate with early replication timing,  
356 whereas late RTDs are deprived of both ORC and MCM (Fig. 5).

357

358 TRANSCRIPTIONAL ACTIVITY STRONGLY INFLUENCES LOCAL ORC/ MCM

359 DISTRIBUTION

360 Type 1 and type 2 AS are at their transcribed borders are characterized by  
361 drastic changes in the occupancy of ORC and MCM (Fig. 2). More specific, actively  
362 transcribed gene bodies were devoid of MCM, while ORC and, to a lesser degree,  
363 MCM were detected at active TSS (Fig. 3a). Remarkably, a prominent peak at TSS  
364 was also observed for MCM in *post*-chromatin (Fig. 3b). Thereby, the prominence of  
365 this peak strictly correlates with transcriptional activity of the neighboring gene,  
366 although not with the transcriptional level (Fig. 3d, Supplementary Fig. 6a). These  
367 findings suggest that active TSS are efficient in replication licensing. Two  
368 possibilities might explain this feature: First, TSS are hotspots of ORC binding as  
369 they are easily accessible and represent sites where MCM re-association starts for the  
370 next cell cycle when CDK activity is low<sup>44</sup>. In the following G1 phase, MCM  
371 complexes are distributed from these sites to upstream regions but not downstream  
372 into transcribed gene bodies. Depletion of ORC and MCM from actively transcribed  
373 gene bodies is independent from the level of transcriptional activity (Fig. 3e and  
374 Supplementary Fig. 6b). The displacement of MCM might be due to the moving RNA  
375 polymerase II, as suggested by Powel et al.<sup>13</sup>. Second, residual amounts of MCM are  
376 being observed in MCM-immunoblots of chromatin association experiments in  
377 G2/M<sup>33</sup>. These MCM molecules might be located at TSS and remain on chromatin  
378 throughout the cell cycle. The prominent peak is only visible, if the majority of  
379 intergenic MCM has been displaced from chromatin after replication during S phase.  
380 In this hypothesis, TSS would constitute cell cycle-independent MCM storage sites.  
381 Initiating DNA replication at TSS reduces the risk colliding replication and  
382 transcription forks<sup>41</sup>.  
383

384 LATE REPLICATING NON-GENIC AS CORRELATE WITH H4K20ME3 BUT MAY REQUIRE  
385 ADDITIONAL FEATURES

386 H4K20 methylation has multiple functions in ensuring genome integrity, such  
387 as DNA replication<sup>39,45,46</sup>, DNA damage repair, and chromatin compaction<sup>32,47,48</sup>  
388 suggesting that the different functions are context dependent and executed with  
389 different players. We previously demonstrated that H4K20me3 provides a platform to  
390 enhance origin formation in late replicating heterochromatin<sup>18</sup>. Shoaib and colleagues  
391 reported recently that H4K20me3 restricts replication licensing to prevent  
392 overreplication<sup>32</sup>. The latter is in line with our observation that mainly ORC but little  
393 MCM are enriched at H4K20me3 peaks (Fig. 4a). However, when selecting for  
394 H4K20me3-containing non-genic AS, we detect both elevated ORC and MCM in this  
395 particular AS subset, suggesting that the amount of MCM is sufficient for replication  
396 activation. Yet, we could not detect a general ORC/ MCM enrichment in all non-  
397 genic AS, and it is currently unclear which additional features may be required for  
398 specifying or activating non-genic AS. Together with our previous observations<sup>18</sup>, we  
399 conclude that H4K20me3 is pivotal for the replication of at least a subset of  
400 transcriptionally silent non-genic AS, although there might be still unknown factors  
401 associated to other subsets of non-genic AS.

402

403 DISPERSED MCM BINDING IS CONSISTENT WITH THE CASCADE MODEL

404 While the genome-wide distributions of ORC and MCM are convincingly  
405 mapped by high-throughput ChIP in *S. cerevisiae*<sup>49</sup> and in *Drosophila*<sup>13,27</sup>, the analysis  
406 of pre-RC chromatin binding in human cells still remains a special challenge. To date,  
407 only few genome-wide studies exist for human ORC and Mcm7, which are  
408 identifying binding sites located in early replicating regions near transcribed

409 genes<sup>28,29,31,50</sup>. Replication of metazoan genomes is organized into subnuclear  
410 domains, each containing several clusters<sup>5,6,51</sup>. Within a cluster, replication initiates  
411 stochastically from an excess of dispersed licensed origins. This leads, in comparison  
412 to site-specific chromatin binding factors<sup>52</sup>, to low enrichments of ORC in ChIP  
413 experiments and in particular of MCM, which spreads after chromatin loading<sup>14</sup>. By  
414 choosing a moderate cumulative approach, we were able to eliminate variations due to  
415 stochastic ORC/ MCM binding, while conserving local changes in their binding  
416 patterns.

417 Our data is in line with the previously proposed cascade model that replication  
418 of the human genome involves a superposition of efficient initiation at "master"  
419 origins identified by RFD AS, followed by a cascade of disperse, less efficient origin  
420 activation along the intervening domain<sup>53</sup>. We found a clear depletion of ORC and  
421 MCM in transcription units that border type 1/2 AS, but no convincing depletion of  
422 MCM in the rest of the non-transcribed genome (e.g. compare type 2 AS with non-  
423 transcribed flank (Fig 2d, left side) and non-genic AS with both flanks (Fig. 2e)).  
424 While these data favor a broad dispersion of potential origins within and outside  
425 "master" initiation zones, consistent with the cascade model, we also suggest that a  
426 higher MCM density *is not* a distinguishing feature of AS from the rest of the (non-  
427 transcribed) genome - except perhaps for a subset of non-genic AS associated with  
428 H4K20me3. Instead, initiation zone specification may occur at the origin activation  
429 rather than at the licensing step and may be mediated by preferential accessibility to  
430 limiting factors during S phase<sup>5</sup>. Increased accessibility of MCMs within AS might be  
431 related to the co-enrichment for several active chromatin marks specifically found in  
432 initiation zones even when they are not flanked by active genes, e.g. DNase HS sites,  
433 H3K4me1, H3K27ac, p300<sup>54</sup>.

434

435 GLOBAL ORC DISTRIBUTION CORRELATES WITH REPLICATION TIMING

436 The spatio-temporal replication program is relatively well conserved in  
437 consecutive replication cycles for each cell type, differs only slightly between cell  
438 lines and changes during differentiation<sup>55</sup>. Many studies have shown that the timing  
439 program correlates with topological domains and all origins within one domain  
440 replicate in the same time frame<sup>3,51</sup>. Topological domains are remarkably stable,  
441 explaining why the spatial replication profile is conserved<sup>56</sup>. Early RTDs correlate  
442 with topological domains enriched in ORC and are characterized by active  
443 transcription and chromatin activating features, as previously shown<sup>24</sup> and confirmed  
444 by our data. Currently it is controversially discussed, if higher amounts of ORC<sup>28,29</sup> or  
445 the excess of reiteratively loaded MCM<sup>14,42</sup> determine replication timing.

446 Our results imply that the global density of ORC correlates with replication  
447 timing. This observation is independent from local transcriptional influences, as we  
448 removed all genes including 10kb of flanking regions from our analyses. We propose  
449 that highly dynamic euchromatin generates advantageous conditions allowing the  
450 binding of ORC to chromatin (Fig. 6a). The spatial association of MCM to chromatin  
451 is actively regulated by transcription as transcribed gene bodies are kept clear of  
452 licensing (Fig. 6a). The organizational link between active transcription and  
453 replication directly ties transcriptional programs and replication patterns during  
454 cellular re-organization, as for example differentiation. Comparing replication  
455 licensing and initiation patterns in pluripotent stem cells and differentiated cells will  
456 give further insights in this functional connection of transcription and replication.

457 Heterochromatin is predominantly replicated late in S phase and ORC binding  
458 is enhanced through specific interactions with histone modifications (e.g.



459 H4K20me3<sup>18</sup>). This leads to lower global ORC levels in late RTDs, compared to early  
460 RTDs (Fig. 5a). However, we speculate that these specific ORC-chromatin  
461 interactions lead to sufficient MCM loading (Fig. 6b), as we observe higher MCM  
462 levels than ORC levels in late RTDs.

463 The flexibility in origin activation and the stochastic use of replication origins  
464 allows the cell to adapt to environmental constraints. In summary, we found origin  
465 licensing throughout the genome, which allows the cell to activate replication  
466 wherever needed. In early replicating chromatin, the origin licensing and initiation  
467 pattern is tightly connected with the transcriptional program, whereas in late  
468 replication domains other factors, including H4K20me3, are shaping these replication  
469 processes.

470

## 471 **Online Methods**

### 472 **Cell culture**

473 Raji cells (ATCC) were cultivated at 37°C and 5% CO<sub>2</sub> in RPMI 1640 (Gibco,  
474 Thermo Fisher, USA) supplemented with 8% FCS (Lot BS225160.5, Bio&SELL,  
475 Germany), 100 Units/ml Penicillin/ 100 µg/ml Streptomycin (Gibco, Thermo Fisher,  
476 USA), 1x MEM non-essential amino acids (Gibco, Thermo Fisher, USA), 2 mM L-  
477 Glutamin (Gibco, Thermo Fisher, USA), and 1 mM Sodium pyruvate (Gibco, Thermo  
478 Fisher, USA).

479

### 480 **RNA extraction, sequencing, TPM calculation**

481 RNA was extracted from 3 x 10<sup>5</sup> Raji cells using Direct-zol™ RNA MiniPrep kit  
482 (Zymo Research) according to manufacturers' instructions. RNA quality was  
483 confirmed by Bioanalyzer RNA integrity numbers between 9.8 and 10 followed by

484 library preparation (Encore Complete RNA-Seq Library Systems kit (NuGEN)).  
485 Single-end 100 bp sequencing was performed by Illumina HiSeq 1500 to a  
486 sequencing depth of 25 million reads. The reads were mapped to hg19 genome using  
487 Tophat2 and assigned to annotated genes (HTSeq-count)<sup>57,58</sup>. TPM values  
488 (Transcripts per kilobase per million reads) were calculated for each sample

489  $(\frac{\text{reads per gene}}{\text{exon length} \times 10^{-3}} / \frac{\text{sum}(\frac{\text{reads per gene}}{\text{exon length} \times 10^{-3}})}{10^6})$  as previously described<sup>59</sup>.

490

#### 491 **Replication fork directionality profiling using OK-seq method in Raji<sup>37</sup>**

492 Raji OK-seq was recently published as part of Wu *et al.* and is available from the  
493 European Nucleotide Archive under accession number PRJEB25180 (see data access  
494 section)<sup>37</sup>. Reads > 10 nt were aligned to the human reference genome (hg19) using  
495 the BWA (version 0.7.4) software with default parameters<sup>60</sup>. We considered uniquely  
496 mapped reads only and counted identical alignments (same site and strand) as one to  
497 remove PCR duplicate reads. Five biological replicates were sequenced providing a  
498 total number of 193.1 million filtered reads (between 19.1 and 114.1 million reads per  
499 replicate). RFD was computed as  $RFD = \frac{(R-F)}{(R+F)}$ , where "R" (resp. "F") is the number  
500 of reads mapped to the reverse (resp. forward) strand of the considered regions. RFD  
501 profiles from biological replicates were highly correlated, with Pearson correlation  
502 computed in 50 kb non-overlapping windows with > 100 mapped reads (R+F) ranging  
503 from 0.962 to 0.993. Reads from the 5 replicate experiments were pooled together for  
504 further analyses.

505

#### 506 **Determining regions of ascending and descending RFD**

507 RFD profiling of 2 human cell lines revealed that replication primarily initiates  
508 stochastically within broad (up to 150kb) zones and terminates dispersedly between  
509 them. These initiation zones correspond to quasi-linear ascending segments (AS) of  
510 varying size and slope within the RFD profiles. As previously described for mean  
511 replication timing profiles analysis<sup>61,62</sup>, we determined the smoothed RFD profile  
512 convexity from the convolution with the second derivative of the Gaussian function  
513 of standard deviation 32 kb. 4891 AS were delineated as the regions between positive  
514 and negative convexity extrema of large amplitude. The amplitude threshold was set  
515 in a conservative manner in order to mainly detect the most prominent initiation zones  
516 described by Petryk et al. and avoid false positives<sup>25</sup>. Noting *pos\_5'* and *pos\_3'* the  
517 location of the start and end position of an AS, each AS was associated to its size  
518 *pos\_3'-pos\_5'* and the RFD shift across its length:  $\Delta\text{RFD} = \text{RFD}(\text{pos}_5') - \text{RFD}$   
519 (*pos\_3'*).

520

### 521 **Centrifugal elutriation and flow cytometry**

522 For centrifugal elutriation,  $5 \times 10^9$  exponentially growing Raji cells were harvested,  
523 washed with PBS and resuspended in 50 ml RPMI 1680/ 8% FCS/ 1mM EDTA/ 0.25  
524 U/ml DNaseI (Roche, Germany). Concentrated cell suspension was passed through 40  
525  $\mu\text{m}$  cell strainer and injected in a Beckman JE-5.0 rotor with a large separation  
526 chamber turning at 1500 rpm and a flow rate of 30 ml/min controlled by a Cole-  
527 Parmer Masterflex pump. While rotor speed was kept constant, 400 ml fractions were  
528 collected at increasing flow rates (40, 45, 50, 60, 80 ml/min). Individual fractions  
529 were quantified,  $5 \times 10^6$  cells washed in PBS, Ethanol fixed, RNase treated and  
530 stained with 0.5 mg/ml Propidium Iodide. DNA content was measured using the FL2

531 channel of FACSCalibur™ (BD Biosciences, Germany). Remaining cells were  
532 subjected to cross-link.

533

#### 534 **Cross-link**

535 Raji cells were washed twice with PBS, resuspended in PBS to a concentration of 2 x  
536 10<sup>7</sup> cells/ml and passed through 100 µm cell strainer (Corning Inc., USA). Fixation  
537 for 5 min at room temperature was performed by adding an equal volume of PBS 2%  
538 methanol-free formaldehyde (Thermo Scientific, USA) and stopped by the addition of  
539 glycine (125 mM final concentration). After washing once with PBS and once with  
540 PBS 0.5% NP-40, cells were resuspended in PBS containing 10% glycerol, pelleted  
541 and snap frozen in liquid nitrogen.

542

#### 543 **Cyclin Western Blot**

544 Cross-linked samples were thawed on ice, resuspended in LB3+ sonication buffer  
545 containing protease inhibitor and 10 mM MG132. After sonicating 3 x 5 min (30 sec  
546 on, 30 sec off) using Bioruptor in presence of 212-300 µm glass beads, samples were  
547 treated with 50 U Benzonase for 15 min at room temperature and centrifuged 15 min  
548 at maximum speed. 50 µg protein lysates were loaded on 10% SDS-polyacrylamid gel  
549 (Cyclin A1/A2, Cyclin B1), or 12.5%-15% gradient gel (H3S10P). Cyclin A1/A2  
550 (Abcam, ab185619), Cyclin B1 (Abcam, ab72), H3S10P (Cell signaling, D2C8)  
551 antibodies were used in 1:1000 dilutions, GAPDH (clone GAPDH3 10F4, rat IgG2c;  
552 Monoclonal Antibody Core Facility, Helmholtz Center München) was diluted 1:50.  
553 HRP-coupled secondary antibodies were used in 1:10000 dilutions. Detection was  
554 done using ECL on CEA Blue Sensitive X-ray films.

555

556 **Chromatin sonication**

557 Cross-linked cell pellets were thawed on ice, resuspended LB3+ buffer (25 mM  
558 HEPES (pH 7.5), 140 mM NaCl, 1 mM EDTA, 0.5 mM EGTA, 0.5% Sarcosyl, 0.1%  
559 DOC, 0.5% Triton-X-100, 1X protease inhibitor complete (Roche, Germany)) to a  
560 final concentration of  $2 \times 10^7$  cells/ml. Sonication was performed in AFA Fiber &  
561 Cap tubes (12x12 mm, Covaris, Great Britain) at an average temperature of 5°C at  
562 100W, 150 cycles/burst, 10% duty cycle, 20 min (post fraction: 17 min) using the  
563 Covaris S220 (Covaris Inc., UK).

564

565 **Chromatin immunoprecipitation and qPCR quality control**

566 Sheared chromatin was pre-cleared with 50 µl protein A Sepharose 4 Fast Flow beads  
567 (GE Healthcare, Germany) per 500 µg chromatin for 2h. 500 µg chromatin (or 250 µg  
568 for histone methylation) were incubated with rabbit anti-Orc2, anti-Orc3, anti-Mcm3,  
569 anti-Mcm7<sup>30</sup>, mouse anti-H4K20me1 (Diagenode, MAb-147-100), rabbit anti-  
570 H4K20me3 (Diagenode, MAb-057-050), or IgG isotype control for 16h at 4°C. BSA-  
571 blocked protein A beads (0.5 mg/ml BSA, 30 µg/ml salmon sperm, 1X protease  
572 inhibitor complete, 0.1% Triton-X-100 in LB3(-) buffer (without detergents)) were  
573 added (50 µl/ 500 µg chromatin) and incubated for at least 4h on orbital shaker at  
574 4°C. Sequential washing steps with RIPA (0.1% SDS, 0.5% DOC, 1% NP-40, 50 mM  
575 Tris (pH 8.0), 1 mM EDTA) 150mM NaCl, RIPA-300 mM NaCl, RIPA-250 mM  
576 LiCl buffer, and twice in TE (pH 8.0) buffer were performed. Immunoprecipitated  
577 chromatin fragments were eluted from the beads by shaking twice at 1200 rpm for 10  
578 min at 65°C in 100µl TE 1% SDS. The elution was treated with 80 µg RNase A for  
579 2h at 37°C and with 8 µg proteinase K at 65°C for 16h. DNA was purified using the  
580 NucleoSpin Extract II Kit. Quantitative PCR analysis of the EBV *oriP* DS element

581 (for pre-RC ChIP), or H4K20me1 and -me3 positive loci were performed using the  
582 SYBR Green I Master Mix (Roche) and the Roche LightCycler 480 System. Oligo  
583 sequences for qPCR were DS\_fw: AGTTCACTGCCCGCTCCT, DS\_rv:  
584 CAGGATTCCACGAGGGTAGT, H4K20me1positive\_fw:  
585 ATGCCTTCTTGCTCTTGTC, H4K20me1positive\_rv:  
586 AGTTAAAAGCAGCCCTGGTG, H4K20me3positive\_fw:  
587 TCTGAGCAGGGTTGCAAGTAC, H4K20me3positive\_rv:  
588 AAGGAAATGATGCCAGCTG. Chromatin sizes were verified by loading 1-2  $\mu$ g  
589 chromatin on a 1.5% agarose gel. Samples were quantified using Qubit HS dsDNA.  
590

#### 591 **ChIP-sample sequencing**

592 ChIP sample library preparations from > 4 ng of ChIP-DNA was performed using  
593 Accel-NGS® 1S Plus DNA Library Kit for Illumina (Swift Biosciences). 50 bp  
594 single-end sequencing was done with the Illumina HiSEQ 1500 sequencer to a  
595 sequencing depth of ~ 70 million reads. Fastq-files were mapped against the human  
596 genome (hg19, GRCh37, version 2009), extended for the EBV genome (NC007605)  
597 using bowtie (v1.1.1)<sup>63</sup>. Pileup profiles were generated in R by extending 50 bp reads  
598 by 75 bp at both sites, and calculating the number of reads per base. Sequencing  
599 pileup profiles were visualized in Integrated Genome Browser<sup>64</sup>.

600 For H4K20me1 and -me3 ChIP-seq data in *pre*-fractioned cells, MACS2 peak-calling  
601 was performed using the broad setting and overlapping peaks in three replicated were  
602 retained for further analyses.

603

#### 604 **Binning approach and normalization**

605 All data processing and analysis steps were performed in R (v.3.2.3), visualizations  
606 were done using the ggplot2 (v3.1.0) package<sup>65</sup>. The numbers of reads were  
607 calculated in non-overlapping 1 or 10 kb bins and saved in bed files for further  
608 analysis. To combine replicates, their sum per bin was calculated (= read frequency).  
609 To adjust for sequencing depth, the mean frequency per bin was calculated for the  
610 whole sequenced genome and all bins' counts were divided by this mean value. To  
611 account for variations in the input sample, we additionally divided by the relative read  
612 frequency of the input. This resulted in relative read frequency ranging from 0 to ~30  
613 Pair-wise Pearson correlations of each ORC/ MCM sample in *pre*- and *post*-fractions  
614 were clustered by hierarchical clustering using complete linkage clustering.

615

#### 616 **Relation of ChIP relative read frequencies to DNase hypersensitivity**

617 The ENCODE 'DNase clusters' track wgEncodeRegDnaseClusteredV3.bed.gz  
618 (03.12.2017) containing DNase hypersensitive sites from 125 cell lines were retrieved  
619 from  
620 [http://hgdownload.soe.ucsc.edu/goldenPath/hg19/encodeDCC/wgEncodeRegDnaseCl](http://hgdownload.soe.ucsc.edu/goldenPath/hg19/encodeDCC/wgEncodeRegDnaseClustered/)  
621 [ustered/](http://hgdownload.soe.ucsc.edu/goldenPath/hg19/encodeDCC/wgEncodeRegDnaseClustered/). Bins overlapping or not with HS sites larger than 1 kb were defined and the  
622 respective ChIP read frequency assigned for comparison.

623

#### 624 **Comparison of ChIP relative read frequencies to replication data**

625 AS were aligned on their left (5') and right (3') borders. Mean and standard error of  
626 the mean (SEM) of relative read frequencies of aligned 1 kb bins were then computed  
627 to assess the average ChIP signal around the considered AS borders 50 kb away from  
628 the AS to 10 kb within the AS. To make sure bins within the AS were closer to the  
629 considered AS border than to the opposite border, only AS of size >20 kb were used

630 (3247/4891). We also limited this analysis to AS corresponding to efficient initiation  
631 zones by requiring  $\Delta\text{RFD} > 0.5$ , filtering out a further 290 lowly efficient AS.  
632 In order to question the relationship between AS and transcription, we compared the  
633 results obtained for different AS groups: 506 AS were classified as non-genic AS  
634 when the AS locus extended 20-kb at both ends did not overlap any annotated gene;  
635 the remaining 2451 AS were classified as genic AS. From the latter group, 673 AS  
636 were classified as type 1 AS when both AS borders were flanked by at least one  
637 actively transcribed genes (distance of both AS borders to the closest transcribed  
638 (TPM>3) gene body was <20 kb), and 1026 AS were classified as type 2 AS when  
639 only one AS border was associated to a transcribed gene (see also Table 1).  
640 In order to assess the role of H4H20me3 mark on AS specification, we also classified  
641 as H4K20me3-containing non-genic AS, where the input normed H4K20me3 relative  
642 read frequency was above the genome mean value by more than 1.5 standard  
643 deviation (also estimated over the whole genome). This resulted in 154 non-genic AS  
644 with H4K20me3 higher than genome average and 242 non-genic AS with H4K20me3  
645 signal lower than genome average.  
646  
647 **Comparison of ChIP relative read frequencies to transcription data**  
648 Gene containing bins were determined and overlapping genes removed from the  
649 analysis. For cumulative analysis, we only worked with genes larger 30kb, and  
650 assigned the gene expression levels in TPM accordingly. Genes were either aligned at  
651 their transcriptional start site (TSS) or their transcriptional termination site (TTS) and  
652 the corresponding ChIP read frequencies were calculated in a 30kb window around  
653 the site.  
654



655 **Comparison of ChIP relative read frequencies to replication timing**

656 For identification of RTDs in Raji cells, we used the early to late replication timing  
657 ratio determined by Repli-seq<sup>43</sup>. We directly worked from the precomputed early to  
658 late log-ratio from supplementary file GSE102522\_Raji\_log2\_hg19.txt downloaded  
659 from GEO (accession number GSE102522). The timing of every non-overlapping  
660 10 kb bin was calculated as the averaged  $\log_2$  (early/late) ratio within the surrounding  
661 100 kb window. Early RTDs were defined as regions where the average log-ratio  $>$   
662 1.6 and late RTDs as regions where the average log-ratio  $< -2.0$ . These RTDs were  
663 used to classify ChIP read relative frequencies calculated in 10 kb bins as early or late  
664 replication timing. Bins overlapping gene extended by 10 kb on both sides were  
665 removed from the analysis to avoid effects of gene activity on ChIP signals.

666

667 **Data access**

668 Data has been deposited to the European Nucleotide Archive (ENA,  
669 <https://www.ebi.ac.uk/ena>). OK-seq data in Raji cells is available under the accession  
670 numbers PRJEB25180 (study) and SAMEA104651899 (sample accession, 5  
671 replicates). Raji RNA-seq data is available under the accession number PRJEB31867  
672 (study) and SAMEA5537240, SAMEA5537246, and SAMEA5537252 (sample  
673 accession per replicate). Raji ChIP-seq data was deposited under the accession  
674 number PRJEB32855.

675

676 **Acknowledgements**

677 We thank Tobias Straub for initial help with bioinformatical analyses, Torsten Krude  
678 and Till Bartke for critical comments on the manuscript.

679 A.S. was supported by the Deutsche Forschungsgemeinschaft (SFB 1064 TP05),  
680 SPP1230 and by the HELENA graduate school of the Helmholtz Zentrum München.  
681 B.A. and O.H were supported by the Agence Nationale de la Recherche (ANR-15-  
682 CE12-0011). O.H. was supported by the Ligue Nationale Contre le Cancer (Comité de  
683 Paris), the Association pour la Recherche sur le Cancer, the Fondation pour la  
684 Recherche Médicale (FRM DEI201512344404), the Cancéropôle Ile-de-France and  
685 the INCa (PL-BIO16-302), and the program "Investissements d'Avenir" launched by  
686 the French Government and implemented by the ANR (ANR-10-IDEX-0001-02  
687 PSL\*Research University). W.H. was supported by Deutsche  
688 Forschungsgemeinschaft (SFB1064/TP A13, SFB-TR36/TP A04), Deutsche  
689 Krebshilfe (grant number 70112875), and National Cancer Institute (grant number  
690 CA70723).

691

#### 692 **Author contributions**

693 N.K. designed and performed the majority of experiments; A.B. performed the RNA-  
694 seq experiment and TPM analysis; X.W. performed OK-seq experiments, S.K. and  
695 H.B. generated the sequencing library and sequencing, W.H. designed RNA-seq  
696 experiments; O.H. developed OK-seq, B.A supervised bioinformatic analyses; B.A.  
697 and N.K. performed bioinformatic analyses; A.S. proposed and designed the project  
698 and experimental systems; N.K. and A.S. wrote the manuscript with comments from  
699 O.H and B.A.; All the authors read and approved the manuscript.

700

#### 701 **Competing Interests statement**

702 The authors declare no competing interests.

703

704 **References**

- 705 1 Prioleau, M. N. & MacAlpine, D. M. DNA replication origins-where do we  
706 begin? *Genes Dev* **30**, 1683-1697, doi:10.1101/gad.285114.116 (2016).
- 707 2 Huberman, J. A. & Riggs, A. D. Autoradiography of chromosomal DNA fibers  
708 from Chinese hamster cells. *Proc Natl Acad Sci U S A* **55**, 599-606 (1966).
- 709 3 Pope, B. D. *et al.* Topologically associating domains are stable units of  
710 replication-timing regulation. *Nature* **515**, 402-405,  
711 doi:10.1038/nature13986 (2014).
- 712 4 Zhao, P. A., Rivera-Mulia, J. C. & Gilbert, D. M. Replication Domains: Genome  
713 Compartmentalization into Functional Replication Units. *Adv Exp Med Biol*  
714 **1042**, 229-257, doi:10.1007/978-981-10-6955-0\_11 (2017).
- 715 5 Boos, D. & Ferreira, P. Origin Firing Regulations to Control Genome  
716 Replication Timing. *Genes (Basel)* **10**, doi:10.3390/genes10030199 (2019).
- 717 6 Guilbaud, G. *et al.* Evidence for sequential and increasing activation of  
718 replication origins along replication timing gradients in the human  
719 genome. *PLoS Comput Biol* **7**, e1002322,  
720 doi:10.1371/journal.pcbi.1002322 (2011).
- 721 7 Dimitrova, D. S., Prokhorova, T. A., Blow, J. J., Todorov, I. T. & Gilbert, D. M.  
722 Mammalian nuclei become licensed for DNA replication during late  
723 telophase. *J Cell Sci* **115**, 51-59 (2002).
- 724 8 Gerhardt, J., Jafar, S., Spindler, M. P., Ott, E. & Schepers, A. Identification of  
725 new human origins of DNA replication by an origin-trapping assay. *Mol Cell*  
726 *Biol* **26**, 7731-7746 (2006).
- 727 9 Siddiqui, K. & Stillman, B. ATP-dependent assembly of the human origin  
728 recognition complex. *J Biol Chem* **282**, 32370-32383 (2007).

- 729 10 Bell, S. P. & Kaguni, J. M. Helicase loading at chromosomal origins of  
730 replication. *Cold Spring Harbor perspectives in biology* **5**,  
731 doi:10.1101/cshperspect.a010124 (2013).
- 732 11 Evrin, C. *et al.* A double-hexameric MCM2-7 complex is loaded onto origin  
733 DNA during licensing of eukaryotic DNA replication. *Proc Natl Acad Sci U S*  
734 *A* **106**, 20240-20245, doi:0911500106 [pii]  
735 10.1073/pnas.0911500106 (2009).
- 736 12 Remus, D. & Diffley, J. F. Eukaryotic DNA replication control: lock and load,  
737 then fire. *Curr Opin Cell Biol* **21**, 771-777, doi:S0955-0674(09)00152-5  
738 [pii]  
739 10.1016/j.ceb.2009.08.002 (2009).
- 740 13 Powell, S. K. *et al.* Dynamic loading and redistribution of the Mcm2-7  
741 helicase complex through the cell cycle. *EMBO J* **34**, 531-543,  
742 doi:10.15252/emj.201488307 (2015).
- 743 14 Hyrien, O. How MCM loading and spreading specify eukaryotic DNA  
744 replication initiation sites. *F1000Res* **5**,  
745 doi:10.12688/f1000research.9008.1 (2016).
- 746 15 Marahrens, Y. & Stillman, B. A yeast chromosomal origin of DNA replication  
747 defined by multiple functional elements. *Science* **255**, 817-823 (1992).
- 748 16 Cayrou, C. *et al.* The chromatin environment shapes DNA replication origin  
749 organization and defines origin classes. *Genome Res* **25**, 1873-1885,  
750 doi:10.1101/gr.192799.115 (2015).
- 751 17 Smith, O. K. & Aladjem, M. I. Chromatin structure and replication origins:  
752 Determinants of chromosome replication and nuclear organization. *J Mol*  
753 *Biol* **426**, 3330-3341, doi:10.1016/j.jmb.2014.05.027 (2014).

- 754 18 Brustel, J. *et al.* Histone H4K20 tri-methylation at late-firing origins ensures  
755 timely heterochromatin replication. *EMBO J* **36**, 2726-2741,  
756 doi:10.15252/embj.201796541 (2017).
- 757 19 Besnard, E. *et al.* Unraveling cell type-specific and reprogrammable human  
758 replication origin signatures associated with G-quadruplex consensus  
759 motifs. *Nat Struct Mol Biol* **19**, 837-844, doi:10.1038/nsmb.2339 (2012).
- 760 20 Langley, A. R., Graf, S., Smith, J. C. & Krude, T. Genome-wide identification  
761 and characterisation of human DNA replication origins by initiation site  
762 sequencing (ini-seq). *Nucleic Acids Res*, doi:10.1093/nar/gkw760 (2016).
- 763 21 Mesner, L. D. *et al.* Bubble-seq analysis of the human genome reveals  
764 distinct chromatin-mediated mechanisms for regulating early- and late-  
765 firing origins. *Genome Res* **23**, 1774-1788, doi:10.1101/gr.155218.113  
766 (2013).
- 767 22 McGuffee, S. R., Smith, D. J. & Whitehouse, I. Quantitative, genome-wide  
768 analysis of eukaryotic replication initiation and termination. *Mol Cell* **50**,  
769 123-135, doi:10.1016/j.molcel.2013.03.004 (2013).
- 770 23 Smith, D. J. & Whitehouse, I. Intrinsic coupling of lagging-strand synthesis  
771 to chromatin assembly. *Nature* **483**, 434-438, doi:10.1038/nature10895  
772 (2012).
- 773 24 Chen, Y. H. *et al.* Transcription shapes DNA replication initiation and  
774 termination in human cells. *Nat Struct Mol Biol* **26**, 67-77,  
775 doi:10.1038/s41594-018-0171-0 (2019).
- 776 25 Petryk, N. *et al.* Replication landscape of the human genome. *Nature*  
777 *communications* **7**, 10208, doi:10.1038/ncomms10208 (2016).

- 778 26 Lebofsky, R., Heilig, R., Sonnleitner, M., Weissenbach, J. & Bensimon, A. DNA  
779 replication origin interference increases the spacing between initiation  
780 events in human cells. *Mol Biol Cell* **17**, 5337-5345, doi:10.1091/mbc.e06-  
781 04-0298 (2006).
- 782 27 MacAlpine, H. K., Gordan, R., Powell, S. K., Hartemink, A. J. & MacAlpine, D.  
783 M. *Drosophila* ORC localizes to open chromatin and marks sites of cohesin  
784 complex loading. *Genome Res* **20**, 201-211, doi:gr.097873.109 [pii]  
785 10.1101/gr.097873.109 (2010).
- 786 28 Dellino, G. I. *et al.* Genome-wide mapping of human DNA-replication  
787 origins: levels of transcription at ORC1 sites regulate origin selection and  
788 replication timing. *Genome Res* **23**, 1-11, doi:10.1101/gr.142331.112  
789 (2013).
- 790 29 Miotto, B., Ji, Z. & Struhl, K. Selectivity of ORC binding sites and the relation  
791 to replication timing, fragile sites, and deletions in cancers. *Proc Natl Acad*  
792 *Sci U S A* **113**, E4810-4819, doi:10.1073/pnas.1609060113 (2016).
- 793 30 Papior, P., Arteaga-Salas, J. M., Gunther, T., Grundhoff, A. & Schepers, A.  
794 Open chromatin structures regulate the efficiencies of pre-RC formation  
795 and replication initiation in Epstein-Barr virus. *J Cell Biol* **198**, 509-528,  
796 doi:10.1083/jcb.201109105 (2012).
- 797 31 Sugimoto, N., Maehara, K., Yoshida, K., Ohkawa, Y. & Fujita, M. Genome-wide  
798 analysis of the spatiotemporal regulation of firing and dormant replication  
799 origins in human cells. *Nucleic Acids Res* **46**, 6683-6696,  
800 doi:10.1093/nar/gky476 (2018).
- 801 32 Shoaib, M. *et al.* Histone H4K20 methylation mediated chromatin  
802 compaction threshold ensures genome integrity by limiting DNA

- 803 replication licensing. *Nature communications* **9**, 3704,  
804 doi:10.1038/s41467-018-06066-8 (2018).
- 805 33 Ritzi, M. *et al.* Complex Protein-DNA Dynamics at the Latent Origin of DNA  
806 Replication of Epstein-Barr Virus. *J Cell Sci* **116**, 3971-3984 (2003).
- 807 34 Schepers, A. *et al.* Human origin recognition complex binds to the region of  
808 the latent origin of DNA replication of Epstein-Barr virus. *EMBO J* **20**, 4588-  
809 4602. (2001).
- 810 35 Zhang, Y. *et al.* Model-based analysis of ChIP-Seq (MACS). *Genome Biol* **9**,  
811 R137, doi:10.1186/gb-2008-9-9-r137 (2008).
- 812 36 Feng, J., Liu, T., Qin, B., Zhang, Y. & Liu, X. S. Identifying ChIP-seq enrichment  
813 using MACS. *Nat Protoc* **7**, 1728-1740, doi:10.1038/nprot.2012.101  
814 (2012).
- 815 37 Wu, X. *et al.* Developmental and cancer-associated plasticity of DNA  
816 replication preferentially targets GC-poor, lowly expressed and late-  
817 replicating regions. *Nucleic Acids Res* **46**, 10157-10172,  
818 doi:10.1093/nar/gky797 (2018).
- 819 38 Cayrou, C. *et al.* Genome-scale analysis of metazoan replication origins  
820 reveals their organization in specific but flexible sites defined by conserved  
821 features. *Genome Res* **21**, 1438-1449, doi:10.1101/gr.121830.111 (2011).
- 822 39 Picard, F. *et al.* The spatiotemporal program of DNA replication is  
823 associated with specific combinations of chromatin marks in human cells.  
824 *PLoS Genet* **10**, e1004282, doi:10.1371/journal.pgen.1004282 (2014).
- 825 40 Takahashi, T. S., Wigley, D. B. & Walter, J. C. Pumps, paradoxes and  
826 ploughshares: mechanism of the MCM2-7 DNA helicase. *Trends Biochem Sci*  
827 **30**, 437-444, doi:10.1016/j.tibs.2005.06.007 (2005).

- 828 41 Hamperl, S., Bocek, M. J., Saldivar, J. C., Swigut, T. & Cimprich, K. A.  
829 Transcription-Replication Conflict Orientation Modulates R-Loop Levels  
830 and Activates Distinct DNA Damage Responses. *Cell* **170**, 774-786 e719,  
831 doi:10.1016/j.cell.2017.07.043 (2017).
- 832 42 Das, S. P. *et al.* Replication timing is regulated by the number of MCMs  
833 loaded at origins. *Genome Res* **25**, 1886-1892, doi:10.1101/gr.195305.115  
834 (2015).
- 835 43 Sima, J., Bartlett, D. A., Gordon, M. R. & Gilbert, D. M. Bacterial artificial  
836 chromosomes establish replication timing and sub-nuclear compartment  
837 de novo as extra-chromosomal vectors. *Nucleic Acids Res* **46**, 1810-1820,  
838 doi:10.1093/nar/gkx1265 (2018).
- 839 44 Diffley, J. F. & Labib, K. The chromosome replication cycle. *J Cell Sci* **115**,  
840 869-872 (2002).
- 841 45 Beck, D. B., Oda, H., Shen, S. S. & Reinberg, D. PR-Set7 and H4K20me1: at the  
842 crossroads of genome integrity, cell cycle, chromosome condensation, and  
843 transcription. *Genes Dev* **26**, 325-337, doi:10.1101/gad.177444.111  
844 (2012).
- 845 46 Tardat, M. *et al.* The histone H4 Lys 20 methyltransferase PR-Set7 regulates  
846 replication origins in mammalian cells. *Nat Cell Biol* **12**, 1086-1093,  
847 doi:10.1038/ncb2113 (2010).
- 848 47 Jorgensen, S., Schotta, G. & Sorensen, C. S. Histone H4 lysine 20 methylation:  
849 key player in epigenetic regulation of genomic integrity. *Nucleic Acids Res*  
850 **41**, 2797-2806, doi:10.1093/nar/gkt012 (2013).



- 851 48 Nakamura, K. *et al.* H4K20me0 recognition by BRCA1-BARD1 directs  
852 homologous recombination to sister chromatids. *Nat Cell Biol* **21**, 311-318,  
853 doi:10.1038/s41556-019-0282-9 (2019).
- 854 49 Wyrick, J. J. *et al.* Genome-wide distribution of ORC and MCM proteins in *S.*  
855 *cerevisiae*: high-resolution mapping of replication origins. *Science* **294**,  
856 2357-2360 (2001).
- 857 50 Sugimoto, N. *et al.* Cdt1-binding protein GRWD1 is a novel histone-binding  
858 protein that facilitates MCM loading through its influence on chromatin  
859 architecture. *Nucleic Acids Res* **43**, 5898-5911, doi:10.1093/nar/gkv509  
860 (2015).
- 861 51 Fragkos, M., Ganier, O., Coulombe, P. & Mechali, M. DNA replication origin  
862 activation in space and time. *Nat Rev Mol Cell Biol* **16**, 360-374,  
863 doi:10.1038/nrm4002 (2015).
- 864 52 Schepers, A. & Papior, P. Why are we where we are? Understanding  
865 replication origins and initiation sites in eukaryotes using ChIP-  
866 approaches. *Chromosome Res* **18**, 63-77, doi:10.1007/s10577-009-9087-1  
867 (2010).
- 868 53 Hyrien, O. *et al.* From simple bacterial and archaeal replicons to replication  
869 N/U-domains. *J Mol Biol* **425**, 4673-4689, doi:10.1016/j.jmb.2013.09.021  
870 (2013).
- 871 54 Petryk, N. *et al.* MCM2 promotes symmetric inheritance of modified  
872 histones during DNA replication. *Science* **361**, 1389-1392,  
873 doi:10.1126/science.aau0294 (2018).

- 874 55 Hadjadj, D. *et al.* Characterization of the replication timing program of 6  
875 human model cell lines. *Genom Data* **9**, 113-117,  
876 doi:10.1016/j.gdata.2016.07.003 (2016).
- 877 56 Dimitrova, D. S. & Gilbert, D. M. The spatial position and replication timing  
878 of chromosomal domains are both established in early G1 phase. *Mol Cell*  
879 **4**, 983-993 (1999).
- 880 57 Kim, D. *et al.* TopHat2: accurate alignment of transcriptomes in the  
881 presence of insertions, deletions and gene fusions. *Genome Biol* **14**, R36,  
882 doi:10.1186/gb-2013-14-4-r36 (2013).
- 883 58 Anders, S., Pyl, P. T. & Huber, W. HTSeq--a Python framework to work with  
884 high-throughput sequencing data. *Bioinformatics* **31**, 166-169,  
885 doi:10.1093/bioinformatics/btu638 (2015).
- 886 59 Wagner, G. P., Kin, K. & Lynch, V. J. Measurement of mRNA abundance using  
887 RNA-seq data: RPKM measure is inconsistent among samples. *Theory*  
888 *Biosci* **131**, 281-285, doi:10.1007/s12064-012-0162-3 (2012).
- 889 60 Li, H. & Durbin, R. Fast and accurate short read alignment with Burrows-  
890 Wheeler transform. *Bioinformatics* **25**, 1754-1760,  
891 doi:10.1093/bioinformatics/btp324 (2009).
- 892 61 Audit, B. *et al.* Multiscale analysis of genome-wide replication timing  
893 profiles using a wavelet-based signal-processing algorithm. *Nat Protoc* **8**,  
894 98-110, doi:10.1038/nprot.2012.145 (2013).
- 895 62 Baker, A. *et al.* Replication fork polarity gradients revealed by megabase-  
896 sized U-shaped replication timing domains in human cell lines. *PLoS*  
897 *Comput Biol* **8**, e1002443, doi:10.1371/journal.pcbi.1002443 (2012).

898 63 Langmead, B., Trapnell, C., Pop, M. & Salzberg, S. L. Ultrafast and memory-  
899 efficient alignment of short DNA sequences to the human genome. *Genome*  
900 *Biol* **10**, R25, doi:10.1186/gb-2009-10-3-r25 (2009).

901 64 Freese, N. H., Norris, D. C. & Loraine, A. E. Integrated genome browser:  
902 visual analytics platform for genomics. *Bioinformatics* **32**, 2089-2095,  
903 doi:10.1093/bioinformatics/btw069 (2016).

904 65 R\_Core\_Team. *R: A language and environment for statistical computing*. R  
905 *Foundation for Statistical Computin*, <<https://www.R-project.org>> (2018).

906

907 Figure legends

908 **Figure 1:** ORC/ MCM ChIP-seq is best analyzed using a moderate averaging  
909 approach.

910 a) Sequencing pileup IGB visualization at the Mcm4/PRKDC origin: two samples of  
911 Orc2, Orc3 and three samples of Mcm3, Mcm7 (*pre*-fraction), plotted against the  
912 input. The profiles are shown in a 10 kb window (chr8: 48,868,314 - 48,878,339), the  
913 position of the origin is indicated as green line. Track heights represent raw read  
914 depth. b) The profile of ORC/ MCM ChIP-seq after 1 kb binning at the same locus.  
915 The reads of replicates were summed and normalized by the total genome-wide ChIP  
916 read frequency followed by input division. Y-axis represents the resulting relative  
917 read frequency. c) Correlation plot between Orc2 and Orc3 relative read frequencies  
918 in 1 kb bins. d) Correlation plot between Mcm3 and Mcm7 relative read frequencies  
919 in 1 kb bins. e) Heatmap of Pearson correlation coefficients  $r$  between all *pre*- and  
920 *post*-fraction ChIP relative read frequencies in 1 kb bins. Column and line order were  
921 determined by complete linkage hierarchical clustering.

922

923 **Figure 2:** ORC/ MCM enrichment within AS depends on active transcription.  
924 a) Top: Example of an RFD profile on chr1: 178,400,000 – 182,800,000. Detected AS  
925 are labeled by green rectangles. Bottom: Representative Mcm3 (blue) and Orc2 (red)  
926 profile (*pre*-fraction) after binning for the same region. b-e) Average relative ChIP  
927 read frequencies of Orc2, Orc3, Mcm3, and Mcm7 *pre*-fractions at AS borders of b)  
928 all AS, c) type 1 AS with transcribed genes at both AS borders, d) type 2 AS with  
929 transcribed genes oriented at their right AS border, and e) non-genic AS in gene  
930 deprived regions. The mean of ORC and MCM frequencies are shown  $\pm 2 \times$  SEM  
931 (lighter shadows). The dashed grey horizontal line indicates relative read frequency  
932 1.0 for orientation.

933

934 **Figure 3:** ORC is enriched at active TSS while especially MCM is depleted from  
935 actively transcribed genes.

936 a) - c) Relative ORC/ MCM read frequencies around active TSS or TTS for a) active  
937 genes (TPM > 3) in *pre*, b) active genes (TPM > 3) in *post*, and c) inactive genes  
938 (TPM < 3; *pre*-fraction). Only genes larger than 30 kb without any adjacent gene  
939 within 15 kb were considered. Distances from TSS or TTS are indicated in kb. Means  
940 of ORC and MCM frequencies are shown  $\pm 2 \times$  SEM (lighter shadows). d) ORC/  
941 MCM (*pre*) read frequencies at TSS dependent on transcriptional activity ( $\pm 2 \times$   
942 SEM). e) ORC/ MCM (*pre*) relative read frequencies upstream of TSS and in the gene  
943 body dependent on transcriptional activity ( $\pm 2 \times$  SEM; TSS  $\pm 3$  kb removed from  
944 analysis). Transcriptional activity was classified as: no (TPM < 3), low (TPM 3-10),  
945 mid (TPM 10-40), high (TPM > 40). The dashed grey horizontal line indicates  
946 relative read frequency 1.0 for orientation.

947

948 **Figure 4:** Non-genic late replicating AS containing H4K20me3 are preferentially  
949 enriched in ORC/ MCM.

950 a) Average ORC/ MCM relative read frequencies (*pre*-fraction) at H4K20me3 peaks  
951 (> 1 kb). b) Cumulative relative ChIP read frequencies of H4K20me3 at AS borders  
952 of the different AS types. Means of ChIP read frequencies are shown  $\pm 2 \times$  SEM  
953 (lighter shadows). c) Histogram representation of mean H4K20me3 read frequencies  
954  $\pm 2 \times$  SEM within the different AS types. d) Histogram representation of mean ORC/  
955 MCM read frequencies at non-genic AS without (242 non-genic AS) or with (154  
956 non-genic AS) H4K20me3  $\pm 2 \times$  SEM. The dashed grey horizontal line indicates  
957 relative read frequency 1.0 for orientation.

958

959 **Figure 5:** ORC is highly enriched in early RTDs.

960 a-b) Mean ORC/ MCM read frequencies ( $\pm 2 \times$  SEM) in early or late RTDs of a) the  
961 *pre*-fraction or b) the *post*-fraction. The analysis was performed in 10 kb bins. Any  
962 gene  $\pm 10$  kb was removed from the analysis. The dashed grey horizontal line  
963 indicates relative read frequency 1.0 for orientation.

964

965 **Figure 6:** Model of replication regulation in early and late RTDs.

966 a) In transcriptionally active, early RTDs, ORC preferentially binds active TSS,  
967 where it also loads MCM, which is actively displaced by transcription. The  
968 combination of chromatin accessibility, ORC binding and transcriptional activity  
969 define replication initiation and termination zones. b) In gene deprived, late RTDs,  
970 ORC specifically binds to histone modifications, such as H4K20me3. Lower levels of  
971 MCM loading are sufficient for replication initiation.

972 **Supplementary Figure Legends**

973 **Supplementary Figure 1:** Experimental validation of cell cycle fractionation and

974 ChIP quality.

975 a) Example DNA content (Propidium Iodide) staining followed by FACS of

976 logarithmically growing Raji (top) cells after cell cycle fractionation by centrifugal

977 elutriation (increasing counter flow rates indicated above each profile). b) Western

978 Blot analyses of the single fractions detecting Cyclin A (S/G2), Cyclin B (G2/M),

979 H3S10P (M) and GAPDH. c) qPCR validation of Orc2, Orc3, Mcm3 and Mcm7

980 enrichment at the EBV latent origin *oriP* DS element. Representation in % input.

981 Isotype IgG was used as control.

982

983 **Supplementary Figure 2:** ORC/ MCM ChIP-seq profiles at the MCM4/ PRKDC

984 origin before and after moderate averaging in *post*-fractions.

985 a) Sequencing pileup IGB visualization of two samples of Orc2, Orc3 and three

986 samples of Mcm3, Mcm7, plotted against the input at the Mcm4/PRKDC origin (*post*-

987 fraction, chr8: 48,868,314 - 48,878,339). Track heights represent raw read depth. b)

988 The ORC/ MCM ChIP-seq profile after 1 kb binning at the Mcm4/PRKDC origin

989 (*post*-fraction). The reads of replicates were summed and normalized by the total

990 ChIP read frequency followed by input division. Y-axis represents the resulting

991 relative read frequency. The position of origin is indicated as green line.

992

993 **Supplementary Figure 3:** ORC/ MCM binding is confirmed at DNase HS sites.

994 Mean ORC/ MCM relative read frequencies ( $\pm 2 \times$  SEM) in relation to DNase

995 hypersensitivity a) of the *pre*-fraction and b) of the *post*-fraction. Only HS sites larger

996 1 kb were considered. The dashed grey horizontal line indicates relative read  
997 frequency 1.0 for orientation.

998

999 **Supplementary Figure 4:** Characterization of different AS types.

1000 a) RFD of different AS types plotted at AS borders  $\pm 2 \times$  SEM (lighter shadows). b)

1001 Replication timing ratio  $\log_2$  (early/late) was assigned to type 1, type 2, and non-genic

1002 AS and represented as boxplot.

1003

1004 **Supplementary Figure 5:** ORC/ MCM enrichment decreases within AS in the *post*-

1005 fraction.

1006 a)-d) Average relative ChIP read frequencies of Orc2, Orc3, Mcm3, and Mcm7 *post*-

1007 fractions at AS borders of a) all AS, b) type 1 AS with transcribed genes at both AS

1008 borders, c) type 2 AS with transcribed genes oriented at the right AS border, and d)

1009 non-genic AS in gene deprived regions. The mean of ORC and MCM frequencies are

1010 shown  $\pm 2 \times$  SEM (lighter shadows). The dashed grey horizontal line indicates

1011 relative read frequency 1.0 for orientation.

1012

1013 **Supplementary Figure 6:** ORC/ MCM ChIP read frequencies at TSS and upstream

1014 and downstream of TSS in the *post*-fraction.

1015 a) ORC/ MCM (*post*) relative read frequencies at TSS dependent on transcriptional

1016 activity. Transcriptional activity was classified as: no (TPM < 3), low (TPM 3-10),

1017 mid (TPM 10-40), high (TPM > 40). b) ORC/ MCM (*post*) relative read frequencies

1018 upstream of TSS and in the gene body dependent on transcriptional activity (TSS  $\pm 3$

1019 kb removed from analysis). Error bars correspond to  $\pm 2 \times$  SEM. The dashed grey

1020 horizontal line indicates relative read frequency 1.0 for orientation.

1021

1022 **Supplementary Figure 7:** Characterization of H4K20 methylation profiles.

1023 a) and b) qPCR validation of H4K20me3 and H4K20me1 enrichment after ChIP at a)

1024 an H4K20me3 positive locus and b) an H4K20me1 positive locus. Representation in

1025 % input. Isotype IgG was used as control. c) Boxplot of H4K20me3 and H4K20me1

1026 peak size (in bp) distribution. d) Average ORC/ MCM relative read frequencies (*post-*

1027 fraction) at H4K20me3 peaks (> 1 kb). e) Average ORC/ MCM relative read

1028 frequencies (*pre-fraction*) at H4K20me1 peaks (> 1 kb).



1029 **Tables**

1030 Table 1: Characterization of different AS subtypes.

1031 Only AS  $\geq 20$ kb were considered. Genic AS: flanked by genic region(s) irrespective  
1032 of transcriptional activity  $\pm 20$ kb of the AS border. Type 1 and type 2 AS: AS flanked  
1033 by expressed genes (TPM  $\geq 3$ ) within 20kb on both sides (type 1) or one side (type 2).  
1034 Non-genic: no annotated gene  $\pm 20$ kb of AS border.

1035

|              | Number | Genome coverage<br>[%] | Average length<br>[kb] |
|--------------|--------|------------------------|------------------------|
| All AS       | 2,957  | 4.9                    | 52.3                   |
| Genic AS     | 2,451  | 4.1                    | 52.3                   |
| Type 1 AS    | 673    | 1.1                    | 50.7                   |
| Type 2 AS    | 1,026  | 5.2                    | 51.5                   |
| Non-genic AS | 506    | 0.8                    | 52.6                   |

1036

1037 **Supplementary tables**

1038 Supplementary Table 1: Proportion of genes significantly depleted from ORC/

1039 Mcm2-7.

1040 A total of 1,941 genes met the criteria of transcriptional activity (TPM > 3), gene size

1041 larger 30 kb and no adjacent genes within 15 kb. We calculated the proportion of

1042 genes where the mean relative read frequency within the gene was significantly ( $p <$

1043 0.05) reduced compared to the upstream region (excluding TSS +/- 3 kb).

1044

|             | Total genes | $p < 0.05$ | %    |
|-------------|-------------|------------|------|
| <i>pre</i>  | Orc2        | 865        | 44.6 |
|             | Orc3        | 850        | 43.8 |
|             | Mcm3        | 1,460      | 75.2 |
|             | Mcm7        | 1,131      | 58.3 |
|             | 1,941       |            |      |
| <i>post</i> | Orc2        | 651        | 33.5 |
|             | Orc3        | 727        | 37.5 |
|             | Mcm3        | 554        | 28.5 |
|             | Mcm7        | 324        | 16.7 |

1045

1046 Supplementary Table 2: Characterization of H4K20me3 and H4K20me1 peaks  
1047 determined by MACS2 broad peak calling.

1048

|          | Number of peaks<br>(peaks > 1 kb) | Mean peak size<br>[kb] | Peak size range<br>[kb] |
|----------|-----------------------------------|------------------------|-------------------------|
| H4K20me3 | 16,852 (12,251)                   | 3.5                    | 0.2-105.1               |
| H4K20me1 | 12,264 (6,277)                    | 5.5                    | 0.2-182.5               |

1049

1050

1051 Supplementary Table 3: Ratio of ChIP mean relative read frequencies in early vs. late  
1052 RTDs.

1053 Calculated in 10 kb bins. All annotated genic regions were removed  $\pm$  10 kb.

|             |      | Mean relative read frequency<br>ratio (early/late) |
|-------------|------|----------------------------------------------------|
| <i>pre</i>  | Orc2 | 1.40                                               |
|             | Orc3 | 1.47                                               |
|             | Mcm3 | 1.15                                               |
|             | Mcm7 | 1.19                                               |
| <i>post</i> | Orc2 | 1.18                                               |
|             | Orc3 | 1.24                                               |
|             | Mcm3 | 0.93                                               |
|             | Mcm7 | 1.02                                               |

1054

1055

## Figure 1

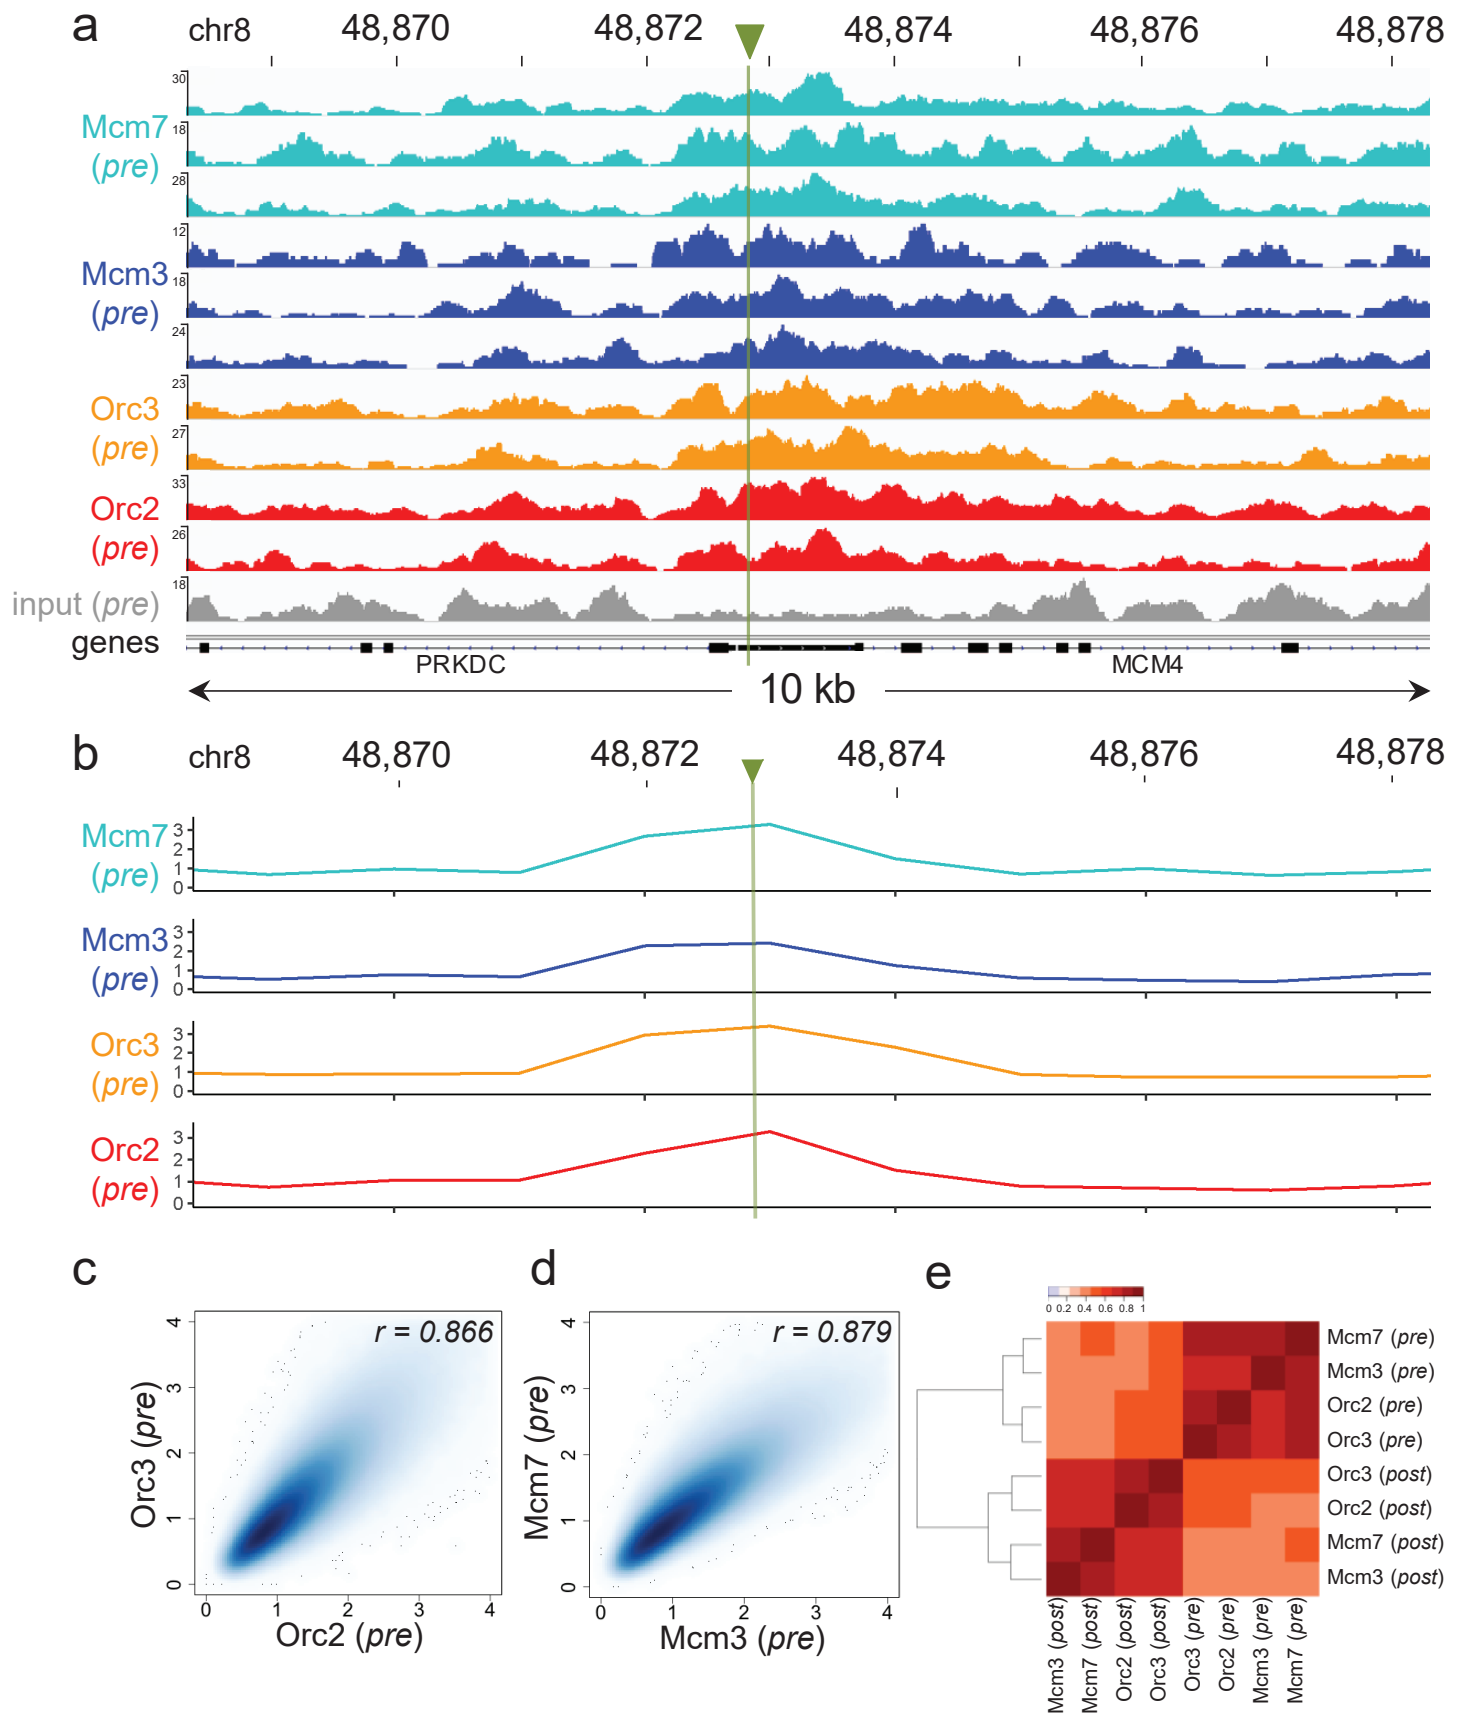

## Figure 2

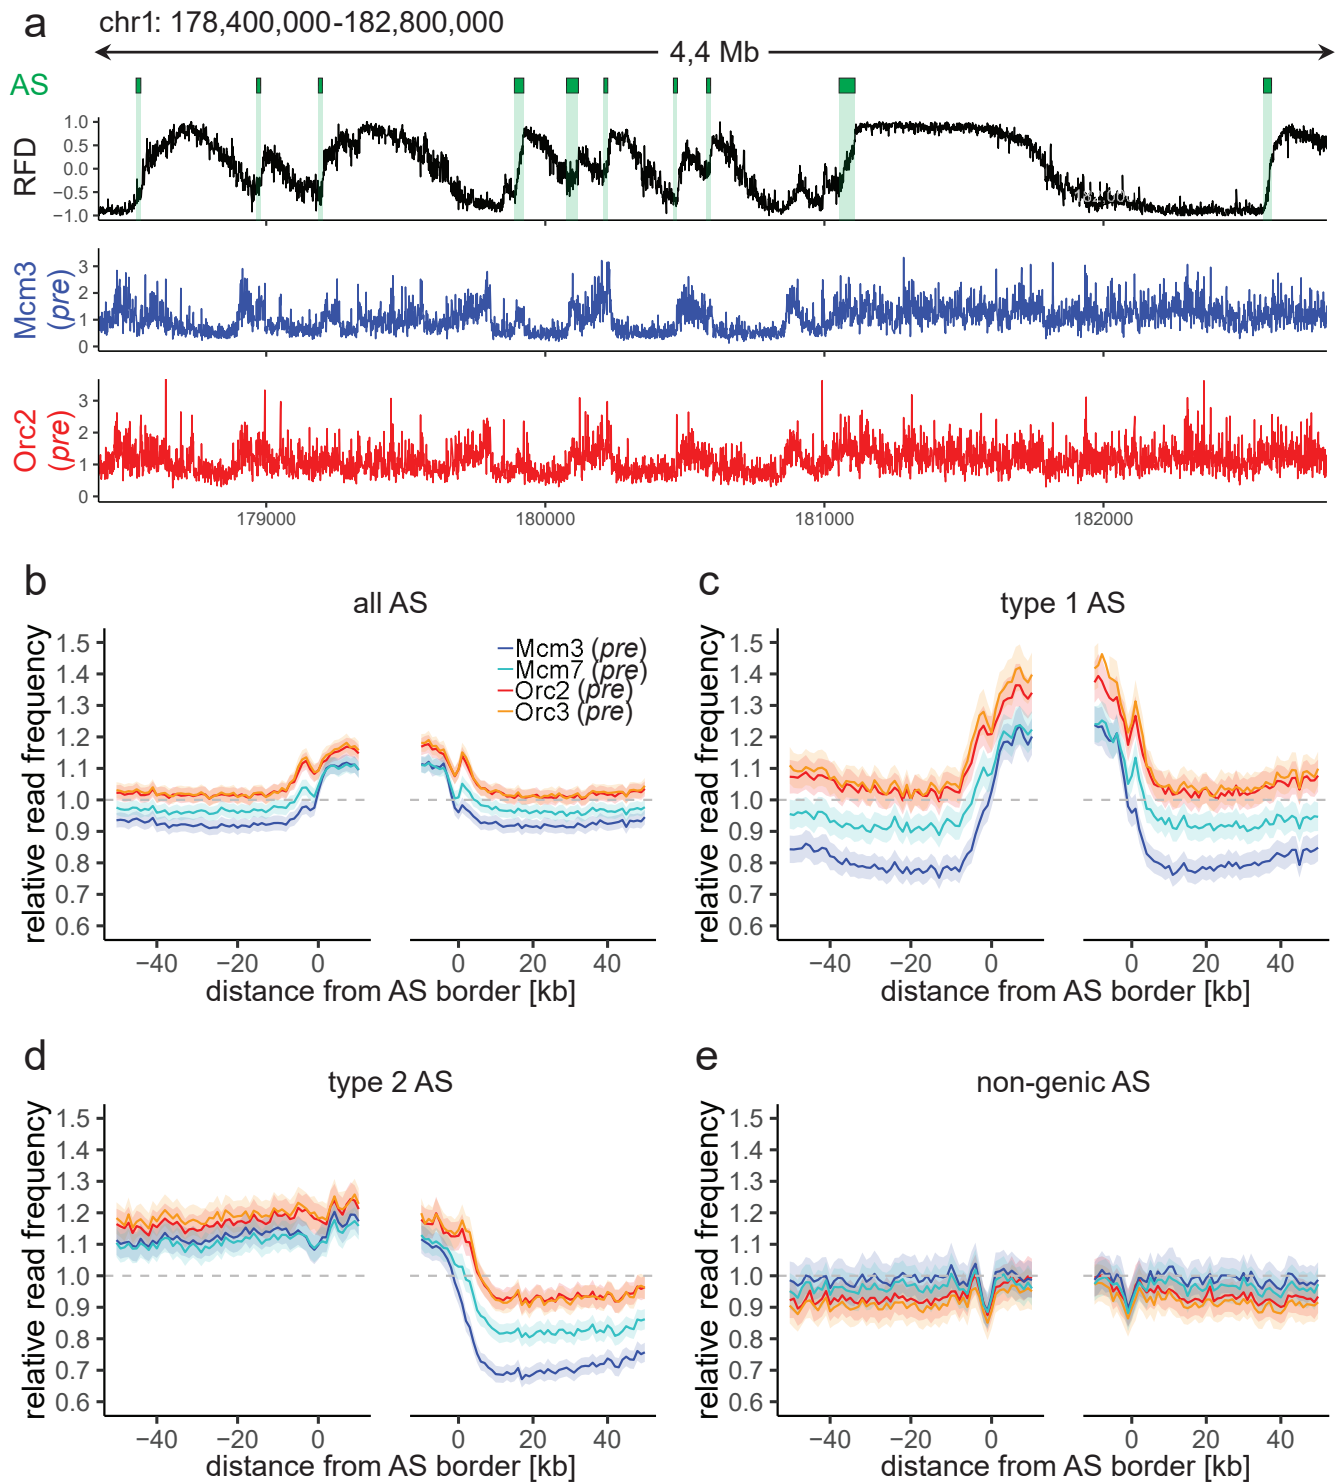

Figure 3

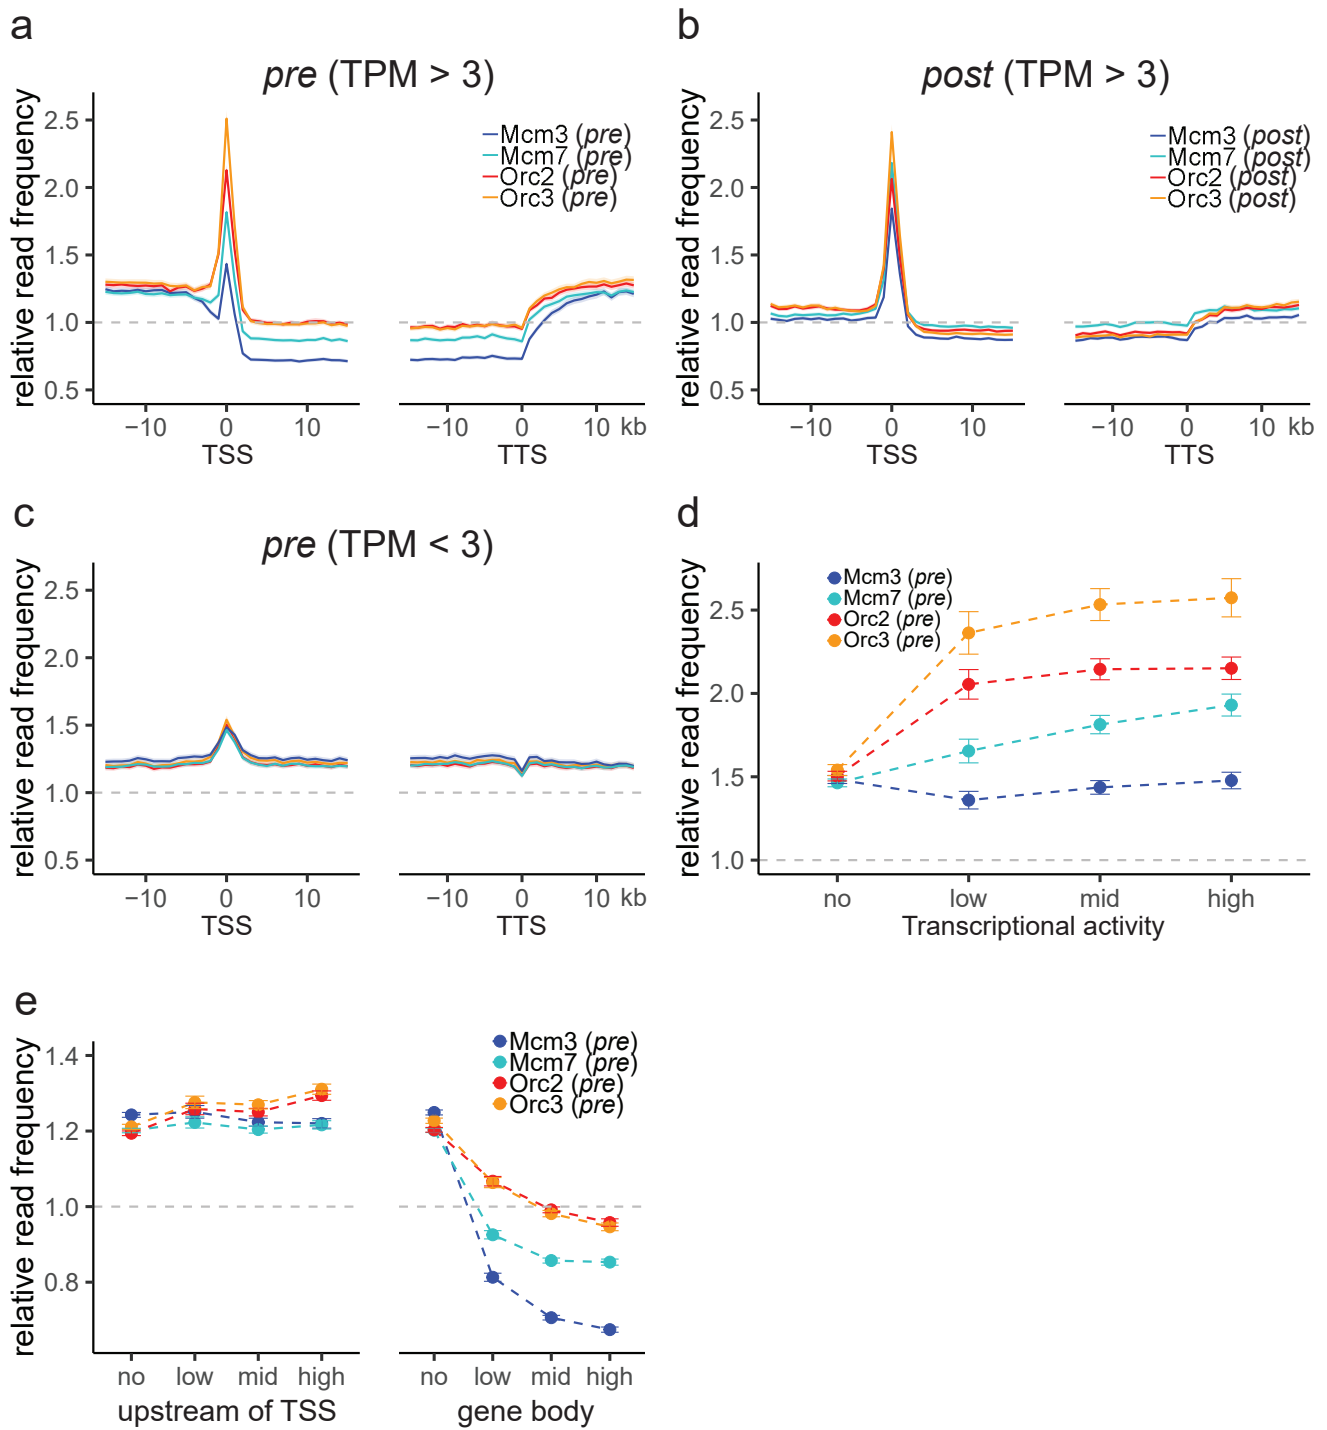

Figure 4

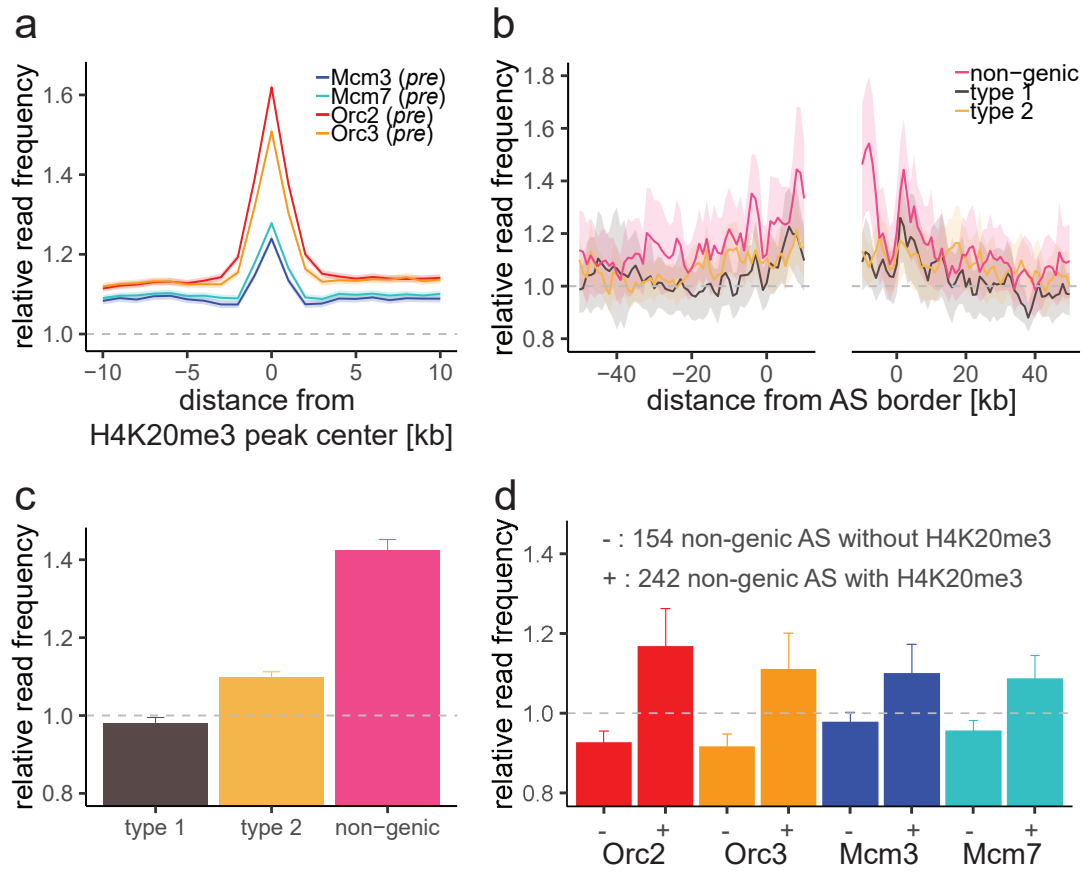

Figure 5

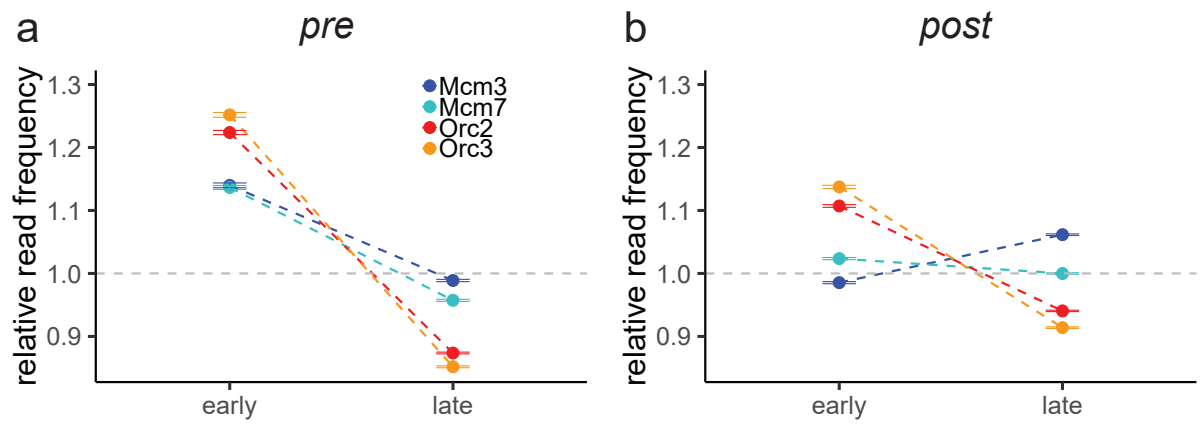



## Figure 6

### a Early RTD

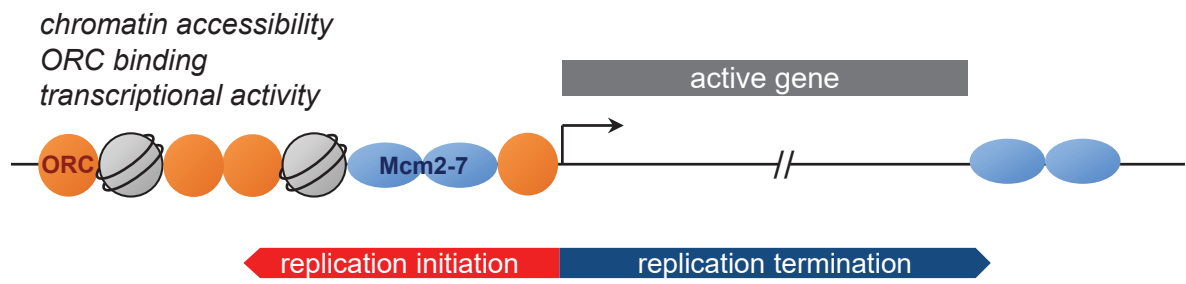

### b Late RTD

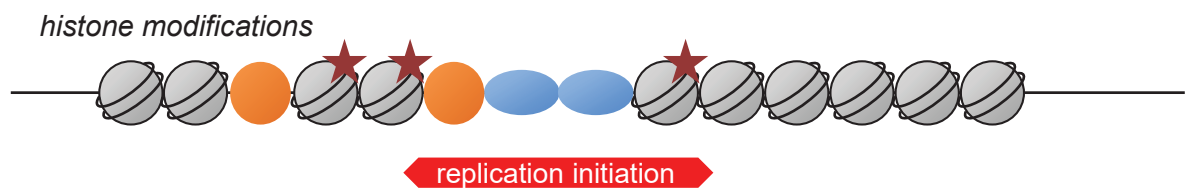

# Supplementary Figure 1

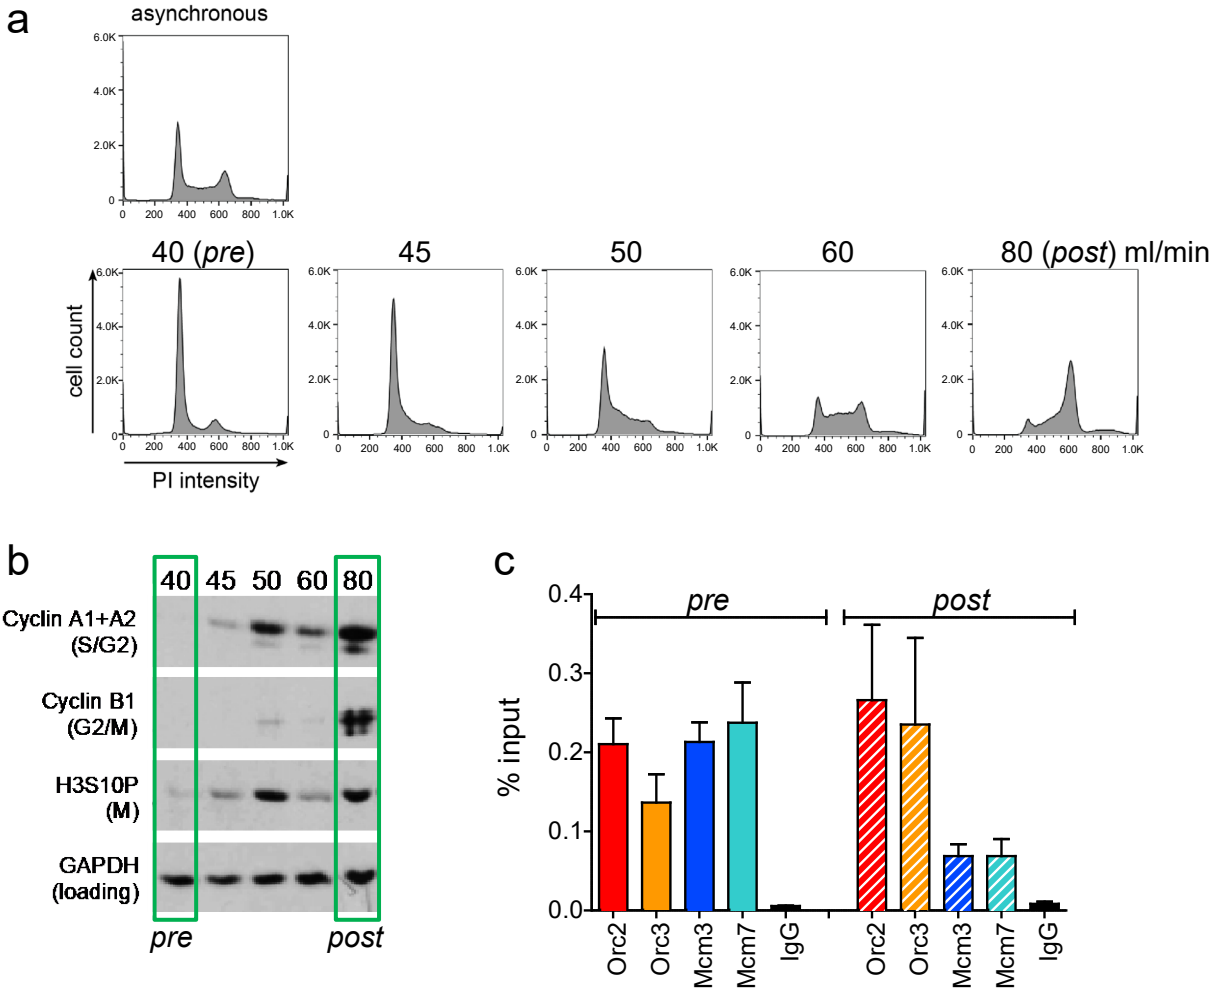

## Supplementary Figure 1: Experimental validation of cell cycle fractionation and ChIP quality.

a) Example DNA content (Propidium iodide) staining followed by FACS of logarithmically growing Raji (top) cells after cell cycle fractionation by centrifugal elutriation (increasing counter flow rates indicated above each profile). b) Western Blot analyses of the single fractions detecting Cyclin A (S/G2), Cyclin B (G2/M), H3S10P (M) and GAPDH. c) qPCR validation of Orc2, Orc3, Mcm3 and Mcm7 enrichment at the EBV latent origin oriP DS element. Representation in % input. Isotype IgG was used as control.

## Supplementary Figure 2

**a** Mcm4/PRKDC: chr8: 48,868,314-48,878,339

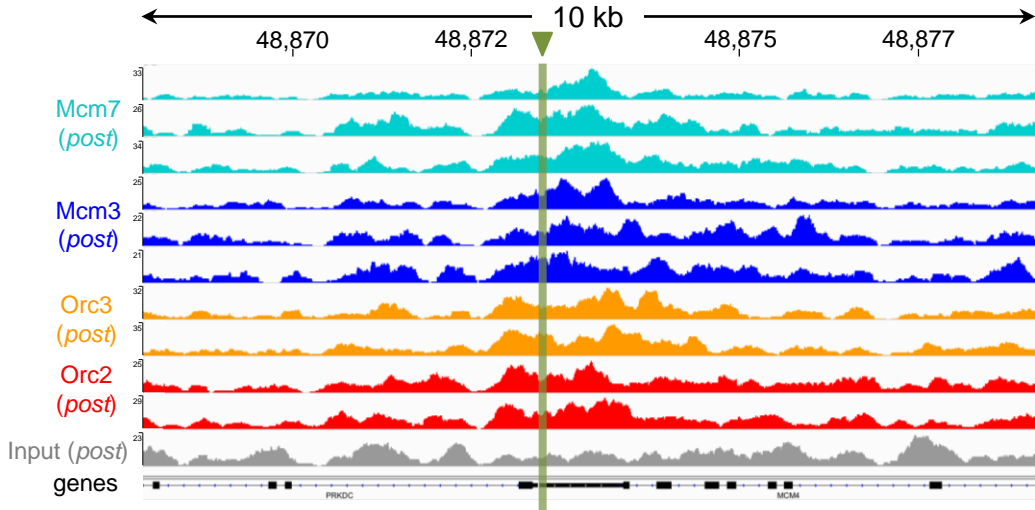

**b** Mcm4/PRKDC: chr8: 48,868,314-48,878,339

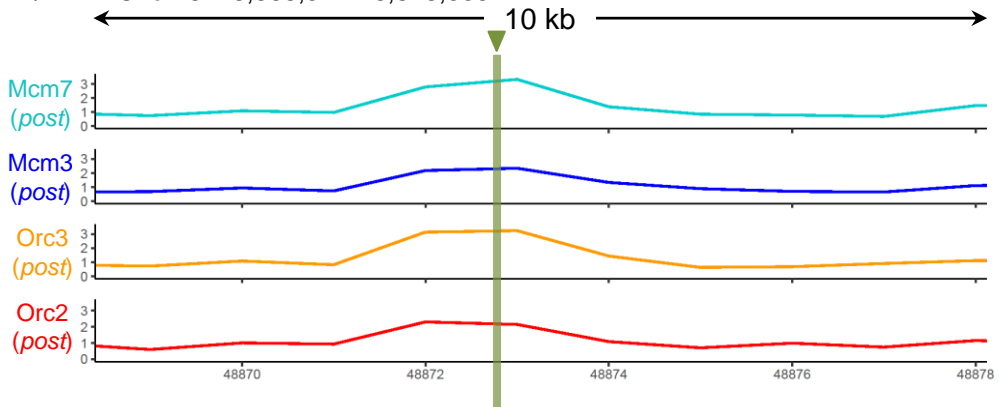

### Supplementary Figure 2: ORC/ MCM ChIP-seq profiles at the MCM4/ PRKDC origin before and after moderate averaging in *post*-fractions.

a) Sequencing pileup IGB visualization of two samples of Orc2, Orc3 and three samples of Mcm3, Mcm7, plotted against the input at the Mcm4/PRKDC origin (*post*-fraction, chr8: 48,868,314 - 48,878,339). Track heights represent raw read depth. b) The ORC/ MCM ChIP-seq profile after 1 kb binning at the Mcm4/PRKDC origin (*post*-fraction). The reads of replicates were summed and normalized by the total ChIP read frequency followed by input division. Y-axis represents the resulting relative read frequency. The position of origin is indicated as green line.

## Supplementary Figure 3

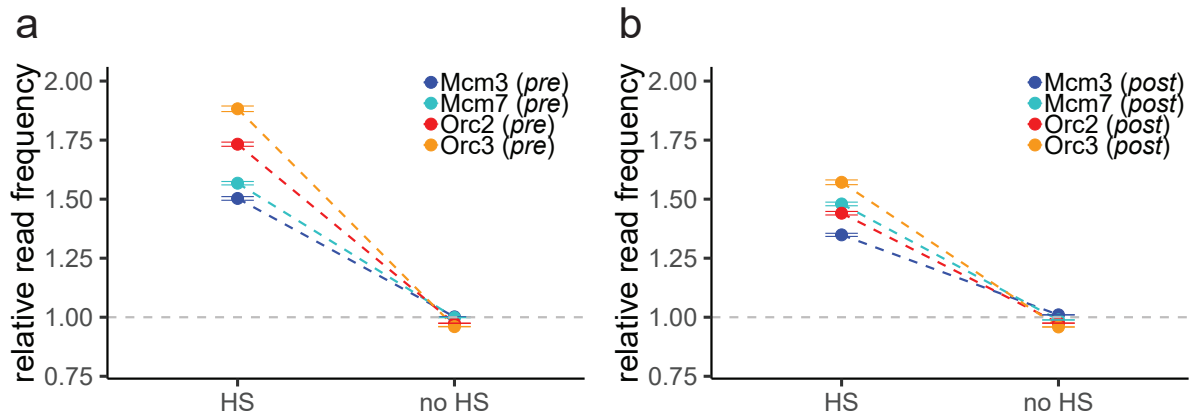

### Supplementary Figure 3: ORC/ MCM binding is confirmed at DNase HS sites.

Mean ORC/ MCM relative read frequencies ( $\pm 2 \times \text{SEM}$ ) in relation to DNase hypersensitivity a) of the *pre*-fraction and. b) of the *post*-fraction. Only HS sites larger 1 kb were considered. The dashed grey horizontal line indicates relative read frequency 1.0 for orientation.

## Supplementary Figure 4

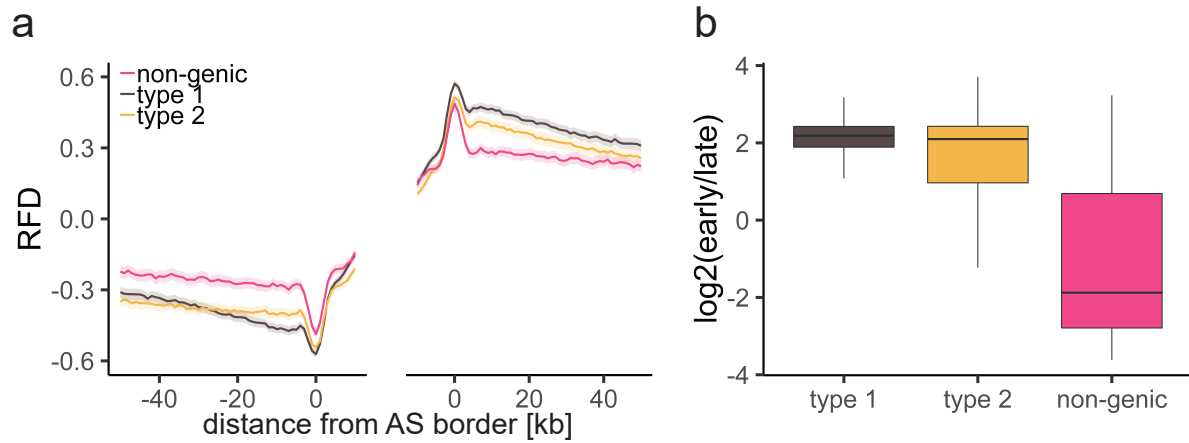

### Supplementary Figure 4: Characterization of different AS types.

a) RFD of different AS types plotted at AS borders  $\pm 2 \times \text{SEM}$  (lighter shadows). b) Replication timing ratio  $\log_2(\text{early/late})$  was assigned to type 1, type 2, and non-genic AS and represented as boxplot.

## Supplementary Figure 5

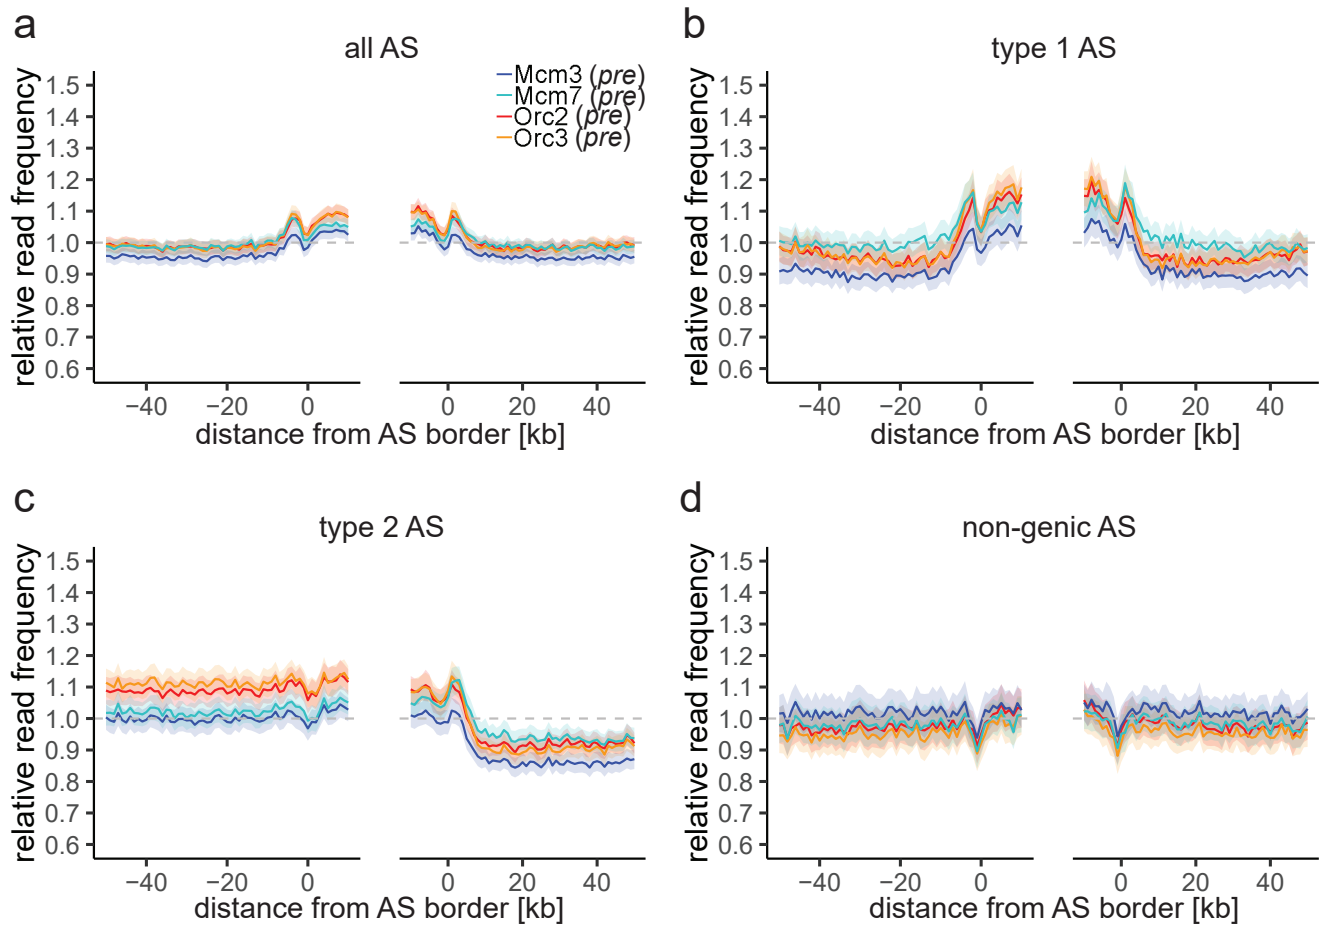

**Supplementary Figure 5: ORC/ MCM enrichment decreases within AS in the *post*-fraction.** a)-d) Average relative ChIP read frequencies of Orc2, Orc3, Mcm3, and Mcm7 *post*-fractions at AS borders of a) all AS, b) type 1 AS with transcribed genes at both AS borders, c) type 2 AS with transcribed genes oriented at the right AS border, and d) non-genic AS in gene deprived regions. The mean of ORC and MCM frequencies are shown  $\pm 2 \times$  SEM (lighter shadows). The dashed grey horizontal line indicates relative read frequency 1.0 for orientation.

## Supplementary Figure 6

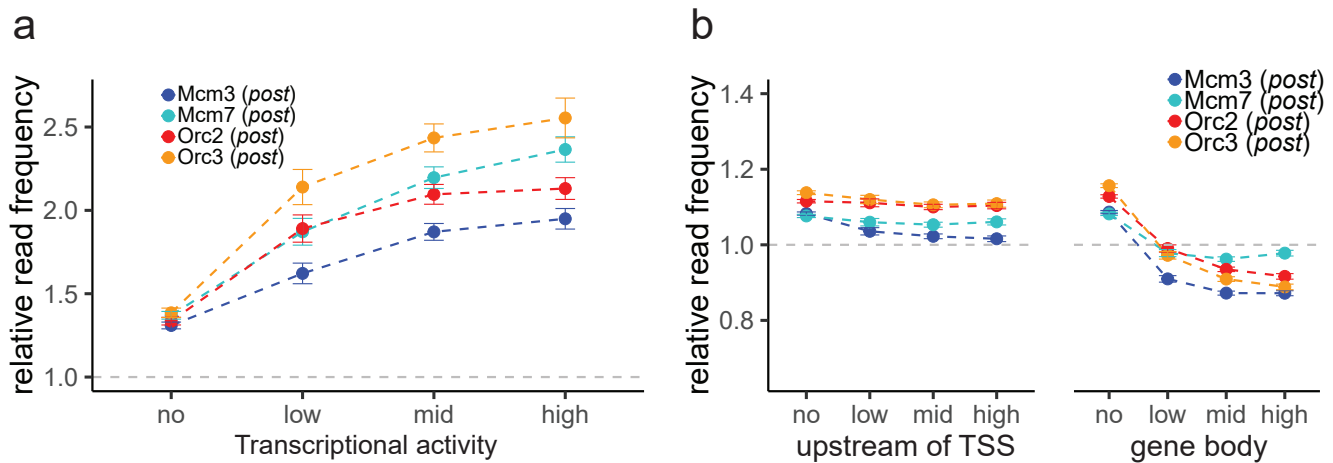

### Supplementary Figure 6: ORC/ MCM ChIP read frequencies at TSS and upstream and downstream of TSS in the *post*-fraction.

a) ORC/ MCM (*post*) relative read frequencies at TSS dependent on transcriptional activity. Transcriptional activity was classified as: no (TPM < 3), low (TPM 3-10), mid (TPM 10-40), high (TPM > 40). b) ORC/ MCM (*post*) relative read frequencies upstream of TSS and in the gene body dependent on transcriptional activity (TSS  $\pm$  3 kb removed from analysis). Error bars correspond to  $\pm 2 \times$  SEM. The dashed grey horizontal line indicates relative read frequency 1.0 for orientation.

## Supplementary Figure 7

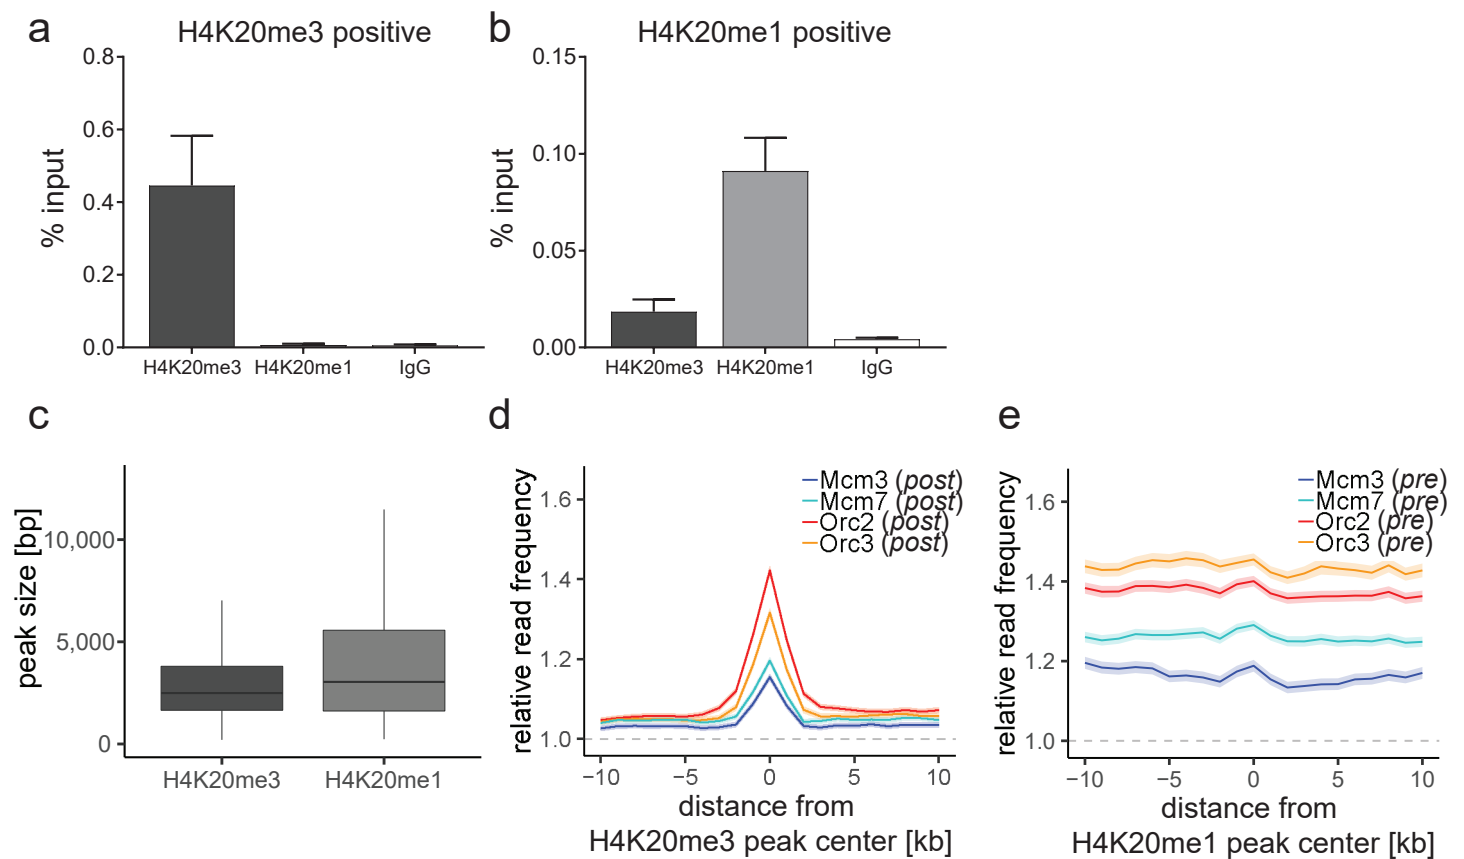

### Supplementary Figure 7: Characterization of H4K20 methylation profiles.

a) and b) qPCR validation of H4K20me3 and H4K20me1 enrichment after ChIP at a) an H4K20me3 positive locus and b) an H4K20me1 positive locus. Representation in % input. Isotype IgG was used as control. c) Boxplot of H4K20me3 and H4K20me1 peak size (in bp) distribution. d) Average ORC/ MCM relative read frequencies (*post*-fraction) at H4K20me3 peaks (> 1 kb). e) Average ORC/ MCM relative read frequencies (*pre*-fraction) at H4K20me1 peaks (> 1 kb).
